# Supplementary material for: Seroprevalence of anti-SARS-CoV-2 antibodies in women attending antenatal care in eastern Ethiopia: a facility-based surveillance
Source: PubMed Central journal article supplement (PMC8613670; doi:10.1136/bmjopen-2021-055834), 2021-11-24
Supplement: bmjopen-2021-055834.draft_revisions.pdf [file bmjopen-2021-055834.draft_revisions.pdf]

# BMJ Open

BMJ Open is committed to open peer review. As part of this commitment we make the peer review history of every article we publish publicly available.

When an article is published we post the peer reviewers' comments and the authors' responses online. We also post the versions of the paper that were used during peer review. These are the versions that the peer review comments apply to.

The versions of the paper that follow are the versions that were submitted during the peer review process. They are not the versions of record or the final published versions. They should not be cited or distributed as the published version of this manuscript.

BMJ Open is an open access journal and the full, final, typeset and author-corrected version of record of the manuscript is available on our site with no access controls, subscription charges or pay-per-view fees (<http://bmjopen.bmj.com>).

If you have any questions on BMJ Open's open peer review process please email [info.bmjopen@bmj.com](mailto:info.bmjopen@bmj.com)

# BMJ Open

## Seroprevalence of anti-SARS-CoV-2 antibodies in women attending antenatal care in eastern Ethiopia

|                               |                                                                                                                                                                                                                                                                                                                                                                                                               |
|-------------------------------|---------------------------------------------------------------------------------------------------------------------------------------------------------------------------------------------------------------------------------------------------------------------------------------------------------------------------------------------------------------------------------------------------------------|
| Journal:                      | <i>BMJ Open</i>                                                                                                                                                                                                                                                                                                                                                                                               |
| Manuscript ID                 | bmjopen-2021-055834                                                                                                                                                                                                                                                                                                                                                                                           |
| Article Type:                 | Original research                                                                                                                                                                                                                                                                                                                                                                                             |
| Date Submitted by the Author: | 25-Jul-2021                                                                                                                                                                                                                                                                                                                                                                                                   |
| Complete List of Authors:     | Assefa, Nega; Haramaya University; London School of Hygiene & Tropical Medicine<br>Regassa, Lemma; Haramaya University<br>Teklemariam, Zelalem; Haramaya University<br>Oundo, Joseph; London School of Hygiene & Tropical Medicine<br>Madrid-Castillo, Lola; London School of Hygiene & Tropical Medicine<br>Dessie, Yadeta; Haramaya University<br>Scott, A; London School of Hygiene and Tropical Medicine, |
| Keywords:                     | COVID-19, Health policy < HEALTH SERVICES ADMINISTRATION & MANAGEMENT, Protocols & guidelines < HEALTH SERVICES ADMINISTRATION & MANAGEMENT, Infection control < INFECTIOUS DISEASES, Prenatal diagnosis < OBSTETRICS                                                                                                                                                                                         |
|                               |                                                                                                                                                                                                                                                                                                                                                                                                               |

SCHOLARONE™  
Manuscripts

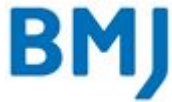

I, the Submitting Author has the right to grant and does grant on behalf of all authors of the Work (as defined in the below author licence), an exclusive licence and/or a non-exclusive licence for contributions from authors who are: i) UK Crown employees; ii) where BMJ has agreed a CC-BY licence shall apply, and/or iii) in accordance with the terms applicable for US Federal Government officers or employees acting as part of their official duties; on a worldwide, perpetual, irrevocable, royalty-free basis to BMJ Publishing Group Ltd ("BMJ") its licensees and where the relevant Journal is co-owned by BMJ to the co-owners of the Journal, to publish the Work in this journal and any other BMJ products and to exploit all rights, as set out in our [licence](#).

The Submitting Author accepts and understands that any supply made under these terms is made by BMJ to the Submitting Author unless you are acting as an employee on behalf of your employer or a postgraduate student of an affiliated institution which is paying any applicable article publishing charge ("APC") for Open Access articles. Where the Submitting Author wishes to make the Work available on an Open Access basis (and intends to pay the relevant APC), the terms of reuse of such Open Access shall be governed by a Creative Commons licence – details of these licences and which [Creative Commons](#) licence will apply to this Work are set out in our licence referred to above.

Other than as permitted in any relevant BMJ Author's Self Archiving Policies, I confirm this Work has not been accepted for publication elsewhere, is not being considered for publication elsewhere and does not duplicate material already published. I confirm all authors consent to publication of this Work and authorise the granting of this licence.

1  
2  
3 1 **Seroprevalence of anti-SARS-CoV-2 antibodies in women attending antenatal**  
4  
5  
6 2 **care in eastern Ethiopia**  
7

8  
9 3 Nega Assefa<sup>1,2, \*</sup>, Lemma Demissie Regassa<sup>1</sup>, Zelalem Teklemariam<sup>1</sup>, Joseph Oundo<sup>2</sup>, Lola  
10 4 Madrid<sup>2</sup>, Yadeta Dessie<sup>1</sup>, J. Anthony G. Scott<sup>2</sup>  
11  
12  
13

14  
15  
16 5 <sup>1</sup> College of Health and Medical Sciences, Haramaya University, Ethiopia  
17

18 6 <sup>2</sup> London School of Hygiene & Tropical Medicine, UK  
19  
20  
21  
22

23  
24 9 \* Corresponding author

25 10 Nega Assefa

26 11 Email: [negaassefa@yahoo.com](mailto:negaassefa@yahoo.com)  
27  
28  
29  
30  
31

32 13 Contact address

33 14 NA: [negaassefa@yahoo.com](mailto:negaassefa@yahoo.com)

34 15 LDR: [esraeldemiss@gmail.com](mailto:esraeldemiss@gmail.com)

35 16 ZT: [zelalemtmariam@yahoo.com](mailto:zelalemtmariam@yahoo.com)

36 17 LM: [lola.madrid-castillo@lshtm.ac.uk](mailto:lola.madrid-castillo@lshtm.ac.uk)

37 18 JO: [joseph.oundo@lshtm.ac.uk](mailto:joseph.oundo@lshtm.ac.uk)

38 19 YD: [yad\\_de2005@yahoo.com](mailto:yad_de2005@yahoo.com)

39 20 JAGS: [anthony.scott@lshtm.ac.uk](mailto:anthony.scott@lshtm.ac.uk)  
40  
41  
42  
43  
44

45 22 Target Journal  
46  
47

48 24 Word counts

49 25 Abstract 245

50 26 Main text 2489  
51  
52  
53  
54  
55  
56  
57  
58  
59  
60

## 29 Abstract

30 **Objective:** We conducted serosurveillance of anti-SARS-CoV-2 antibodies among pregnant  
31 women attending their first antenatal care.

32 **Setting:** The surveillance was set in one referral hospital in Harar, one district hospital and one  
33 health centre located in Haramaya district in rural eastern Ethiopia.

34 **Participants:** We collected questionnaire data and a blood sample from 3,312 pregnant women  
35 between April 1, 2020 and March 31, 2021. We selected 1,447 blood samples at random and  
36 assayed these for anti-SARS-CoV-2 antibodies at Hararghe Health Research laboratory using  
37 WANTAI® SARS-CoV-2 Rapid Test for total immunoglobulin.

38 **Outcome:** We assayed for anti-SARS-CoV-2 antibodies and temporal trends in seroprevalence  
39 were analysed with a  $\chi^2$  test for trend and multivariable binomial regression.

40 **Results:** Among 1,447 sera tested, 83 were positive for anti-SARS-CoV-2 antibodies giving a  
41 crude seroprevalence of 5.7% (95% CI 4.6%, 7.0%). Of 160 samples tested in April-May, 2020,  
42 none was seropositive; the first seropositive sample was identified in June and seroprevalence rose  
43 steadily thereafter ( $\chi^2$  test for trend,  $p=0.003$ ) reaching a peak of 11.8% in February, 2021. In the  
44 multivariable model, seroprevalence was approximately 3% higher in first-trimester mothers  
45 compared to later presentations, and rose by 0.75% (95% CI 0.31%, 1.20%) per month of calendar  
46 time.

47 **Conclusions:** This clinical convenience sample illustrates the dynamic of the SARS-CoV-2  
48 epidemic in young adults in eastern Ethiopia; infection was rare before June 2020 but it spread in  
49 a linear fashion thereafter, rather than following intermittent waves, and reached 10% by the  
50 beginning of 2021. After one year of surveillance, most pregnant mothers remained susceptible.

1  
2  
3 51 **Keywords:** COVID 19, COVID-19 seroprevalence, COVID-19 among pregnant women, COVID-  
4  
5 52 19 in Ethiopia  
6

7  
8 53 **Key summaries:**

9  
10 **What is already known about this subject?**

- 11 54 • Information on the cumulative incidence of SARS-CoV-2 in is scarce and little is known  
12 about.  
13

14  
15 55 **What are the new findings?"**

- 16 • The crude seroprevalence anti-SARS-CoV-2 antibodies among first time ANC  
17 attendants was 5.7%.  
18 • The first seropositive sample was identified in June 2020 and seroprevalence rose  
19 56 steadily thereafter reached a peak of 11.8% in February, 2021.  
20 • Seroprevalence was approximately 3% higher in first-trimester mothers compared to later  
21 presentations, and rose by 0.75% per month of calendar time.  
22 57

23  
24 **How might it impact on clinical practice in the foreseeable future?**

- 25 • The disease spreads among asymptomatic community members unnoticed.  
26 58 • A healthy looking could be source of infection for susceptible individuals. This will  
27 eventually create pressure on health facilities to treat symptomatic cases.  
28 • The effect of COVID infection on birth outcomes needs to be investigated.  
29 59

30  
31 **Strengths and limitations**

32 **Strength**

- 33 60 • Selecting healthy looking first time ANC attendants to represent the general population  
34 • Instituting a surveillance in both tertiary and primary health facilities located in urban  
35 and rural areas represents the urban and rural community.  
36

37 **Limitation**

- 38 61 • Its focus on women visited the health care facilities and missing several not attending  
39 health care.  
40

41 62

42  
43  
44  
45 63

46  
47  
48  
49 64

## 65 Introduction

66 In Ethiopia, the first case of COVID-19 was reported on 13 March 2020. By the end of March  
67 2021 there were 206,589 reports of COVID-19 infection and 2,865 coronavirus-related deaths. In  
68 a country with an estimated population, in 2019, of 112 million this represents a cumulative  
69 incidence of SARS-CoV-2 infection of only 0.2% after a full year of transmission. Many cases of  
70 COVID-19 present with mild symptoms and, in Ethiopia, three quarters of PCR-positive cases  
71 have no symptoms [1,2]. Access to PCR testing in Ethiopia is also sparse. Monitoring the epidemic  
72 by detecting symptomatic cases is, therefore, highly insensitive. In these circumstances,  
73 seroprevalence of anti-SARS-CoV-2 antibodies can provide a more accurate estimator of  
74 cumulative incidence. Undertaking community serosampling during the pandemic is difficult  
75 when travel and household access are constrained by control measures. Expectant mothers,  
76 however, are likely to continue to seek health services throughout the pandemic and they can be  
77 used as a continuously-available proxy population to estimate the cumulative incidence among  
78 young adults [3-5]. In addition, serological surveillance is simple to implement at ANC clinic visits  
79 because anti-SARS-CoV-2 antibodies can be assayed in the residual blood volumes of routine  
80 samples collected for clinical screening for anemia and maternal infectious diseases.

81 Planning and provision of health care during a major epidemic like COVID-19 pose substantial  
82 logistical and clinical challenges. Information on the shape of the epidemic curve is critical to  
83 inform public health responses. The dynamics of seroprevalence reflect the epidemic curve and  
84 can provide an estimate of the effective reproduction number. Seroprevalence also indicates the  
85 likelihood of approaching transmission control through population immunity. This study aimed to  
86 assess the trend in seroprevalence of anti-SARS-CoV-2 antibodies throughout the first year of the

1  
2  
3 87 epidemic by assaying anti-SARS-CoV-2 antibodies among pregnant women attending ante-natal  
4  
5 88 clinic at three different health facilities in the area around Harar, eastern Ethiopia.  
6  
7  
8  
9

## 10 89 **Material and methods**

### 11 12 13 90 **Study area and period**

14  
15  
16 91 The surveillance was conducted between April 1, 2020 and March 31, 2021 at Awoday Health  
17  
18 92 Centre and Haramaya District Hospital, both in Haramaya District, and in Hiwot Fana Specialized  
19  
20 93 Referral University Hospital in Harar. Hiwot Fana is the largest referral and teaching hospital in  
21  
22 94 eastern Ethiopia and receives tertiary referrals from Harari region, East Oromia, Somali region,  
23  
24  
25 95 and Dire Dawa City. It is one of the ten regional centres designated by the Federal Ministry of  
26  
27 96 Health to manage the COVID-19 epidemic. Haramaya Hospital was rapidly designated a COVID-  
28  
29 97 19 treatment facility and women seeking ANC services were therefore referred to Awoday Health  
30  
31  
32 98 Centre after April 16, 2020.  
33

### 34 99 **Study design, population and sample size**

35  
36 100 At the end of March 2020, we integrated Health facility-based surveillance into the routine clinical  
37  
38 101 care of pregnant women at Hiwot Fana Hospital, Awoday Health Centre and Haramaya Hospital.  
39  
40  
41 102 The study population comprised 3306 pregnant women attending their first antenatal care in these  
42  
43 103 three facilities during the surveillance period. A total 78 women were excluded because they were  
44  
45 104 not willing to provide blood sample. Routine antenatal care includes serological screening for HIV,  
46  
47  
48 105 syphilis, and toxoplasma infection during pregnancy undertaken in two blood samples; the first  
49  
50 106 blood sample is taken at 16 weeks' gestation or at the first ANC visit, if later.  
51  
52  
53  
54  
55  
56  
57  
58  
59  
60



1  
2  
3 107 Socio-demographic data and information on pregnancy, clinical symptoms of COVID-19 and co-  
4  
5 108 morbidities was collected by trained nurses. COVID-19 symptoms were defined as at least one of  
6  
7  
8 109 cough, fever, headache or difficulty breathing. Data quality and completeness were checked daily.  
9

10 110

### 11 111 **Laboratory analyses**

12  
13  
14 112 For the anti-SARS-CoV-2 antibodies test, residual blood samples from the routine ANC tests were  
15  
16  
17 113 transferred to a test-tube containing clot activator by trained medical laboratory technologists  
18  
19 114 working in each health facility. The blood samples were allowed to clot and serum was separated  
20  
21 115 by centrifugation at 3000 RPM for 10 minutes. Serum samples were stored at 2-8°C at each site  
22  
23 116 and transported in cool boxes to Hararghe Health Research Laboratory where they were stored at  
24  
25  
26 117 -80°C.

27  
28 118 Samples were tested using WANTAI® SARS-CoV-2 Ab Rapid Test. The test is a lateral flow  
29  
30  
31 119 assay in a cassette format designed for the qualitative detection of total antibodies to SARS-CoV-2  
32  
33 120 in human serum. The receptor-binding domain of the SARS-CoV-2 spike protein is bound at the  
34  
35 121 Test Zone (T) and antibodies are bound at the Control Zone (C) of the cassette. The test has a  
36  
37 122 sensitivity of 100% and specificity of 98.8% under validation performed by the manufacturer;  
38  
39 123 independent validation of the test found a sensitivity of 89% [6]. All the stored serum samples,  
40  
41 124 tests reagents and cassettes were brought to room temperature (15-30°C) thirty minutes before  
42  
43 125 performing the test; 10µl of serum specimen and two drops of diluent buffer were added into the  
44  
45 126 specimen window. Results were read and interpreted as reactive/positive (Red line on C and T) or  
46  
47 127 non-reactive/negative (Red line on C) after 15-20 minutes [6,7]. Serum samples taken ≥14 days  
48  
49 128 after a positive PCR test from COVID-19 infected individuals were used as quality control.  
50  
51

52 129

53 130

### 131 **Patient and Public Involvement statement**

132 In COVID pandemic, much attention have been given for COVID symptomatic cases, while  
133 asymptomatic cases are either not addressed or neglected. In this study, it has been discussed with  
134 public health authorities and community representatives in the study area in several occasions.  
135 Women have much interaction in the community as well in the family. They represent the  
136 community better than other person to learn the dynamics of a disease of such kind. For this reason,  
137 a surveillance was set among pregnant women attending ANC in local health facilities. These  
138 women come to health facilities for check-up, and investigators agreed that, first time ANC visitors  
139 are best representatives.

140 As clients were visiting the antenatal clinic, nurses at the clinic explained the issue of COVID and  
141 asked women if she would like to participate by giving blood sample for testing. Pregnant women  
142 were encouraged to raise any unclear points and then referred to the laboratory for blood sample  
143 collection as they do other tests.

144 Data from this surveillance is made available in public repository. Aggregated data has been shared  
145 to authorities in districts and health facilities to plan for actions against the problem. Pregnant  
146 women attending ANC were given information on the disease nationally, regionally and locally,  
147 and they were also given health education on COVID prevention.

148

### 149 **Statistical analysis**

150 We used STATA version 16.0 for statistical analysis. We estimated unadjusted seroprevalence of  
151 SARS-CoV-2 IgG antibody with a 95% confidence interval (CI). We did not make adjustment for  
152 the test performance characteristics because the manufacturer's validation assay, found very high  
153 sensitivity and specificity. We examined the univariate association between individual

1  
2  
3 154 characteristics and seropositivity using  $\chi^2$  and multivariable associations using binomial  
4  
5  
6 155 regression. The trend in seropositivity with time was tested with a  $\chi^2$  test for trend and in the  
7  
8 156 multivariable model.  
9

10 157

### 11 12 13 158 **Ethical consideration**

14  
15 159 The study was confined to residual clinical blood sample testing and anonymized questionnaire  
16  
17 160 data. It was conducted as part of a public health surveillance, with the approval of the director of  
18  
19 161 each of the three health facilities and the data were made available to relevant bodies including the  
20  
21 162 Regional Health Bureau (Harari and Oromia) and the Ethiopian Public Health Institute (EPHI).  
22  
23 163 Ethical clearance was secured from Institutional Health Research Ethical Review Committee of  
24  
25 164 the College of Health and Medical Sciences, Haramaya University, Ethiopia with clearance  
26  
27 165 number 123/2021.  
28  
29  
30  
31  
32

## 33 166 **Results**

### 34 35 36 37 167 **Demographic characteristics of the study participants**

38  
39 168 Between April 1, 2020 and March 31, 2021 there were 3,313 first visits to the antenatal clinics;  
40  
41 169 1,532 (46.24%) at Hiwot Fana Hospital, 1781 (53.75%) at Awoday Health Centre and Haramaya  
42  
43 170 Hospital. At these, we interviewed and collected blood samples from 3,312 women. We tested a  
44  
45 171 random sample of 1,447 blood specimens (Table 1); 752 (52%) were from Haramaya District  
46  
47 172 (Awoday Health Centre and Haramaya Hospital) and 695 (48%) were from Hiwot Fana Hospital;  
48  
49 173 984 (68%) were urban residents.  
50  
51

52  
53 174 Among the population sample tested, the mean (SD) age was 23.9 (4.7) years and ages ranged  
54  
55 175 from 15 to 45 years. The mean (SD) number of children per mother was 1.5 (1.8). The median  
56  
57  
58  
59  
60

176 (IQR) gestational age at the first antenatal visit was 20 (13-28) weeks. Only 51 (3.5%) had COVID-  
177 19 symptoms at the time of sampling and 8 (<1%) had a history of comorbidity, given as chronic  
178 liver, renal, cardiovascular or 'other' disease. Respiratory diseases, chronic neurological disease,  
179 diabetes mellitus, and cancer were not reported by any participant.

### 180 **Seroprevalence of SARS-CoV-2 antibodies**

181 Of 1,447 samples tested, 83 (5.7%, 95% CI 4.6, 7.0%) were positive for anti-SARS-CoV-2  
182 antibodies. The first seropositive sample was identified on June 11, 2020, and seroprevalence rose  
183 progressively thereafter, with the exception of March 2021, where it dropped sharply ( $\chi^2$  for trend  
184 for the whole year,  $p=0.003$ ; Figure 1).

185 Seroprevalence also varied significantly by trimester of pregnancy and co-morbidity but not by  
186 clinic, residence or COVID-19 symptoms (Table 2). Given the linear growth in seroprevalence  
187 (Figure 1) and better model fit based on Bayesian information criterion, we modelled prevalence  
188 associations as risk differences rather than risk ratios. In a multivariable binomial regression  
189 model, the prevalence difference was -3.2% (95% CI -6.7, -0.4%) and -3.0% (95% CI -6.8,-0.8%)  
190 among women in their second and third trimesters, respectively, compared with those in the first  
191 trimester and the prevalence difference was 0.75% (95% CI 0.31, 1.20%) per month of calendar  
192 time.

### 193 **Discussion**

194 The study provides a simple description of the dynamic of SARS-CoV-2 epidemic in an area where  
195 reliable data are extremely rare. In a population of attendees at ante-natal clinics in three sites in  
196 eastern Ethiopia, antibodies against SARS-CoV-2 first appeared in June 2020 and seroprevalence  
197 rose steadily month on month reaching approximately 10% at the beginning of 2021. Although the  
198 point estimate for March 2021 is substantially lower, the data as a whole evince a strong linear

199 trend and this single estimate is most likely to have deviated from the general direction by chance.

200 If these results are reliable, they indicate that the epidemic is progressing here at a considerably  
201 lower rate than in other settings in East Africa and that the greater majority of the population  
202 remains uninfected, suggesting that the epidemic is still at an early stage.

203 The principal limitations of the study are the potential generalisability of the population under  
204 surveillance and the validity of the serological assay employed. Pregnant women have been used  
205 as an indicator population in prior pandemics, including HIV [8], but also for SARS-CoV-2, both  
206 in high-income settings [4,5,9-13] and low- and middle-income settings, including in neighbouring  
207 Kenya [3]. The principal advantage of sampling pregnant women is that they remain one of the  
208 few patient groups for whom health services cannot be postponed until after the pandemic has  
209 passed. They are permitted and encouraged to attend even in the face of social and movement  
210 restrictions, and so provide a consistent and reliable sampling group. The principal limitation of  
211 this group is their restriction on age and sex, however, in most settings, including other East  
212 African countries, seroprevalence does not vary significantly by sex and the cumulative incidence  
213 in women is likely to represent the infection history of both sexes [14]. Similarly, in most settings  
214 young adults are the group most likely to be infected by SARS-CoV-2 and so the seroprevalence  
215 estimates here are likely to represent the highest risk in the whole population; other age groups,  
216 particularly children and the elderly, are likely to have lower seroprevalence [15,16].

217 The World Health Organization has deprecated the use of rapid tests for SARS-CoV-2 antibodies  
218 for individual diagnosis but recognises their potential value in research [17]. WHO has also  
219 recommended and endorsed quantitative analysis of IgG antibodies using ELISA and has  
220 distributed the WANTAI ELISA kit to countries undertaking serosurveillance. Reliance on  
221 ELISA, however, limits the range of settings in which serosurveillance can be undertaken and

1  
2  
3 222 lateral flow tests have been successfully employed for recurrent community-based nationwide  
4  
5 223 surveys in the UK [18]. When seroprevalence is low, as at the beginning of our study, an assay  
6  
7 224 with imperfect specificity may detect more false positives than true positives. The specificity of  
8  
9 225 the WANTAI rapid test has been estimated by the manufacturer at 98.8%. We assayed 80 samples  
10  
11 226 each month in April and May 2020 without observing a single positive test, suggesting that the  
12  
13 227 specificity is indeed very high. Even if the positive results identified in June included false  
14  
15 228 positives, the progressive rise in seropositivity with time is most unlikely to be influenced  
16  
17 229 materially by a small fraction of false positive results.  
18  
19  
20

21 230 The assay sensitivity may also be imperfect in detecting prior infection because the assay was  
22  
23 231 originally calibrated against sera from symptomatic cases, who generally have higher antibody  
24  
25 232 levels than asymptomatic individuals [19], and because pregnant women who were infected  
26  
27 233 several months ago may have experienced waning of antibody levels and seroreversion [20-24].  
28  
29 234 In general, seroreversion is less problematic in assays that measure total immunoglobulin and in  
30  
31 235 those that target spike antigens, compared to nucleocapsid antigens [22,25], so problem of waning  
32  
33 236 in this study is unlikely to be substantial. Furthermore, if sensitivity is unlikely to decline over  
34  
35 237 time, imperfect sensitivity would not affect the shape of the rising seroprevalence line, though it  
36  
37 238 would underestimate the gradient. If, as estimated in one validation study, the WANTAI rapid test  
38  
39 239 has a sensitivity of only 89% [6], adjustment for test-performance characteristics would elevate  
40  
41 240 our reported seroprevalence results by a factor of 1.12.  
42  
43  
44  
45  
46

47 241 The results are in contrast to most other settings studied which record a sharp take-off in  
48  
49 242 seroprevalence once transmission begins, often rising quickly to high levels. In Kenya for example,  
50  
51 243 women attending an ANC clinic in Kilifi had seroprevalence of 0%, 2% and 11% in consecutive  
52  
53 244 months September-November 2021; those attending ANC clinic in Nairobi had a seroprevalence  
54  
55  
56  
57  
58  
59  
60

1  
2  
3 245 of 50% in August 2020 [3]. The pattern illustrated in eastern Ethiopia is more indicative of a  
4  
5 246 gradually spreading epidemic curve suggesting an effective reproduction number much closer to  
6  
7  
8 247 1.

9  
10 248 In Juba, South Sudan, seroprevalence was 22% in a household survey in August-September 2020  
11  
12 249 [26]; in Kenya, a national estimate for seroprevalence, based on testing blood transfusion donors,  
13  
14 250 was 4.3% in May 2020 [14] and 9.1% two months later [27]. Health Care Workers in Nairobi,  
15  
16 251 Kenya, had a seroprevalence of 44% in August 2020; those in two rural hospitals had  
17  
18 252 seroprevalence of 12-13% in November 2020 [28]. Finally, in Addis Ababa seroprevalence,  
19  
20 253 estimated in May 2020, was 3.0% [29]. Although all these studies used different laboratory assays  
21  
22 254 and varied statistical adjustments, collectively, they suggest that transmission in eastern Ethiopia  
23  
24 255 began later than in much of the rest of the region, including the state capital, and has progressed  
25  
26 256 more slowly.

## 30 31 **Conclusion**

32  
33  
34 258 In summary if seroprevalence is a reliable indicator of cumulative incidence, SARS-CoV-2  
35  
36 259 infection is spreading slowly but steadily in eastern Ethiopia. This contrasts sharply with the  
37  
38 260 recurrent waves of PCR-positive infections apparent in the national surveillance system. One year  
39  
40 261 after the start of the epidemic approximately 10% of women attending ante-natal clinics are  
41  
42 262 seropositive implying that the COVID-19 epidemic is still at an early stage in eastern Ethiopia.

43  
44  
45  
46 263

47  
48  
49  
50 264

265 **References**

- 266 1 Abdela, S. G. *et al.* Clinical Profile and Treatment of COVID-19 Patients: Experiences from  
267 an Ethiopian Treatment Center. *Am J Trop Med Hyg*, doi:10.4269/ajtmh.20-1356 (2020).
- 268 2 Abraha, H. E. *et al.* Clinical features and risk factors associated with morbidity and mortality  
269 among patients with COVID-19 in northern Ethiopia. *Int J Infect Dis* **105**, 776-783,  
270 doi:10.1016/j.ijid.2021.03.037 (2021).
- 271 3 Lucinde, R. *et al.* Sero-surveillance for IgG to SARS-CoV-2 at antenatal care clinics in two  
272 Kenyan referral hospital. *medRxiv submitted* (2021).
- 273 4 Lumley, S. F. *et al.* SARS-CoV-2 antibody prevalence, titres and neutralising activity in an  
274 antenatal cohort, United Kingdom, 14 April to 15 June 2020. *Euro Surveill* **25**,  
275 doi:10.2807/1560-7917.ES.2020.25.41.2001721 (2020).
- 276 5 Villalaín, C. *et al.* Seroprevalence analysis of SARS-CoV-2 in pregnant women along the  
277 first pandemic outbreak and perinatal outcome. *PLOS ONE* **15**, e0243029,  
278 doi:10.1371/journal.pone.0243029 (2020).
- 279 6 Weidner, L. *et al.* Quantification of SARS-CoV-2 antibodies with eight commercially  
280 available immunoassays. *Journal of Clinical Virology* **129**, 104540,  
281 doi:<https://doi.org/10.1016/j.jcv.2020.104540> (2020).
- 282 7 The WANTAI SARS-CoV-2 Ab Rapid Test. *Beijing Wantai Biological Pharmacy*  
283 *Enterprise Co., Ltd. No.31* <[www.ystwt.com](http://www.ystwt.com)> (2020).
- 284 8 Kigadye, R. M. *et al.* Sentinel surveillance for HIV-1 among pregnant women in a  
285 developing country: 3 years' experience and comparison with a population serosurvey.  
286 *AIDS* **7**, 849-855, doi:10.1097/00002030-199306000-00014 (1993).



- 1  
2  
3 287 9 Cosma, S. *et al.* The "scar" of a pandemic: Cumulative incidence of COVID-19 during the  
4 first trimester of pregnancy. *J Med Virol* **93**, 537-540, doi:10.1002/jmv.26267 (2021).  
5 288  
6  
7 289 10 Crovetto, F. *et al.* Seroprevalence and presentation of SARS-CoV-2 in pregnancy. *Lancet*  
8 **396**, 530-531, doi:10.1016/S0140-6736(20)31714-1 (2020).  
9 290  
10  
11 291 11 Flannery, D. D. *et al.* SARS-CoV-2 seroprevalence among parturient women in  
12 Philadelphia. *Sci Immunol* **5**, doi:10.1126/sciimmunol.abd5709 (2020).  
13 292  
14  
15 293 12 Haizler-Cohen, L., Davidov, A., Blitz, M. J. & Fruhman, G. Severe acute respiratory  
16 syndrome coronavirus 2 antibodies in pregnant women admitted to labor and delivery units.  
17 294  
18  
19 295 *Am J Obstet Gynecol* **224**, 112-114, doi:10.1016/j.ajog.2020.09.022 (2021).  
20  
21  
22 296 13 Mattern, J. *et al.* Post lockdown COVID-19 seroprevalence and circulation at the time of  
23 delivery, France. *PLoS One* **15**, e0240782, doi:10.1371/journal.pone.0240782 (2020).  
24 297  
25  
26 298 14 Uyoga, S. *et al.* Seroprevalence of anti-SARS-CoV-2 IgG antibodies in Kenyan blood  
27 donors. *Science* **371**, 79-82, doi:10.1126/science.abe1916 (2021).  
28 299  
29  
30 300 15 Murhekar, M. V. *et al.* SARS-CoV-2 antibody seroprevalence in India, August-September,  
31 2020: findings from the second nationwide household serosurvey. *Lancet Glob Health* **9**,  
32 e257-e266, doi:10.1016/S2214-109X(20)30544-1 (2021).  
33 301  
34  
35 302 16 Pollan, M. *et al.* Prevalence of SARS-CoV-2 in Spain (ENE-COVID): a nationwide,  
36 population-based seroepidemiological study. *Lancet* **396**, 535-544, doi:10.1016/S0140-  
37 6736(20)31483-5 (2020).  
38 303  
39  
40 304 17 World Health Organization. [https://www.who.int/news-room/commentaries/detail/advice-](https://www.who.int/news-room/commentaries/detail/advice-on-the-use-of-point-of-care-immunodiagnostic-tests-for-covid-19)  
41 [on-the-use-of-point-of-care-immunodiagnostic-tests-for-covid-19](https://www.who.int/news-room/commentaries/detail/advice-on-the-use-of-point-of-care-immunodiagnostic-tests-for-covid-19) (2020).  
42 305  
43  
44  
45  
46  
47  
48  
49  
50  
51  
52  
53  
54  
55  
56  
57  
58  
59  
60

- 1  
2  
3 308 18 Moshe, M. *et al.* SARS-CoV-2 lateral flow assays for possible use in national covid-19  
4  
5 309 seroprevalence surveys (React 2): diagnostic accuracy study. *BMJ* **372**, n423,  
6  
7 310 doi:10.1136/bmj.n423 (2021).  
8  
9  
10 311 19 Takahashi, S., Greenhouse, B. & Rodriguez-Barraquer, I. Are Seroprevalence Estimates for  
11  
12 312 Severe Acute Respiratory Syndrome Coronavirus 2 Biased? *J Infect Dis* **222**, 1772-1775,  
13  
14 313 doi:10.1093/infdis/jiaa523 (2020).  
15  
16  
17 314 20 Ibarondo, F. J. *et al.* Rapid Decay of Anti-SARS-CoV-2 Antibodies in Persons with Mild  
18  
19 315 Covid-19. *N Engl J Med* **383**, 1085-1087, doi:10.1056/NEJMc2025179 (2020).  
20  
21  
22 316 21 Long, Q. X. *et al.* Clinical and immunological assessment of asymptomatic SARS-CoV-2  
23  
24 317 infections. *Nat Med* **26**, 1200-1204, doi:10.1038/s41591-020-0965-6 (2020).  
25  
26  
27 318 22 Lumley, S. F. *et al.* The duration, dynamics and determinants of SARS-CoV-2 antibody  
28  
29 319 responses in individual healthcare workers. *Clin Infect Dis*, doi:10.1093/cid/ciab004  
30  
31 320 (2021).  
32  
33  
34 321 23 Muecksch, F. *et al.* Longitudinal Serological Analysis and Neutralizing Antibody Levels in  
35  
36 322 Coronavirus Disease 2019 Convalescent Patients. *J Infect Dis* **223**, 389-398,  
37  
38 323 doi:10.1093/infdis/jiaa659 (2021).  
39  
40  
41 324 24 Ward, H. *et al.* Prevalence of antibody positivity to SARS-CoV-2 following the first peak of  
42  
43 325 infection in England: Serial cross-sectional studies of 365,000 adults. *Lancet Reg Health*  
44  
45 326 *Eur* **4**, 100098, doi:10.1016/j.lanepe.2021.100098 (2021).  
46  
47  
48 327 25 Post, N. *et al.* Antibody response to SARS-CoV-2 infection in humans: A systematic review.  
49  
50 328 *PLoS One* **15**, e0244126, doi:10.1371/journal.pone.0244126 (2020).  
51  
52  
53 329 26 Wiens, K. E. *et al.* Seroprevalence of anti-SARS-CoV-2 IgG antibodies in Juba, South  
54  
55 330 Sudan: a population-based study. *medRxiv*, doi:10.1101/2021.03.08.21253009 (2021).  
56  
57  
58  
59  
60

- 1  
2  
3 331 27 Adetifa, I. M. O. *et al.* Temporal trends of SARS-CoV-2 seroprevalence in transfusion blood  
4  
5 332 donors during the first wave of the COVID-19 epidemic in Kenya. *medRxiv*,  
6  
7 333 doi:<https://www.medrxiv.org/content/10.1101/2021.02.09.21251404v1> (2021).  
8  
9  
10 334 28 Etyang, A. O. *et al.* Seroprevalence of Antibodies to SARS-CoV-2 among Health Care  
11  
12 335 Workers in Kenya. *Clin Infect Dis*, doi:10.1093/cid/ciab346 (2021).  
13  
14 336 29 Kempen, J. H. *et al.* SARS-CoV-2 Serosurvey in Addis Ababa, Ethiopia. *Am J Trop Med*  
15  
16 337 *Hyg* **103**, 2022-2023, doi:10.4269/ajtmh.20-0816 (2020).  
17  
18  
19 338  
20  
21

### 339 **Author contribution**

22  
23  
24 340 NA and JAGS lead overall Surveillance. NA, JAGS, ZT and LDR develop concept of the  
25  
26 341 Surveillance, analyzed the data and wrote the manuscript. ZT provided microbiome data analysis,  
27  
28 342 and interpretation. NA, JAGS, ZT, LDR, LM, JO and YD reviewed the manuscript and give critical  
29  
30 343 feedback. All authors approved the submission of the manuscript to the journal.  
31  
32  
33  
34

### 35 344 **Competing of interest**

36  
37 345 The authors declare no competing interests.  
38  
39  
40  
41

### 42 346 **Funding:**

43  
44 347 Activities of the surveillance and Laboratory analysis was supported by Emory University as part  
45  
46 348 of the CHAMPS network ([www.champshealth.org](http://www.champshealth.org)). JAGS was funded by The Wellcome Trust  
47  
48 349 through a Senior Research Fellowship (214320).  
49  
50  
51  
52  
53  
54  
55  
56  
57  
58  
59  
60

1  
2  
3 350  
4

5 351 **Data availability**

6  
7  
8 352 Data is available in the following link and can be requested using the form in the link.

9  
10 353 <https://dataverse.harvard.edu/dataset.xhtml?persistentId=doi:10.7910/DVN/XIWCXN>.

11  
12  
13  
14 354 **Acknowledgements**

15  
16  
17 355 Investigators would like to thank authorities of the health facilities for facilitating the surveillance

18  
19 356 and pregnant women for voluntarily participating in the study.

20  
21  
22  
23 357

24  
25  
26  
27 358

28  
29  
30  
31 359

32  
33  
34  
35  
36 360

37  
38  
39  
40 361

41  
42  
43  
44  
45 362

1  
2  
3  
4  
5  
6  
7  
8  
9  
10  
11  
12  
13  
14  
15  
16  
17  
18  
19  
20  
21  
22  
23  
24  
25  
26  
27  
28  
29  
30  
31  
32  
33  
34  
35  
36  
37  
38  
39  
40  
41  
42  
43  
44  
45  
46  
47  
48  
49  
50  
51  
52  
53  
54  
55  
56  
57  
58  
59  
60

363 Figure 1: Temporal trend of seroprevalence of anti-SARS-CoV-2 antibodies among pregnant  
364 women presenting for first antenatal care in 3 ANC facilities, eastern Ethiopia, between April  
365 1, 2020 and March 31, 2021

366

367

368

369

370

For peer review only

371 Table 1. Characteristics of 1,447 pregnant mothers attending their first antenatal care at the two  
 372 study areas between April 2020 and March 2021 and sampled at random for the study.

| Characteristics    | Haramaya District |      | Hiwot Fana Hospital |      | Total |      |
|--------------------|-------------------|------|---------------------|------|-------|------|
|                    | n                 | %    | n                   | %    | n     | %    |
| Age in years       |                   |      |                     |      |       |      |
| 14-19              | 98                | 13.0 | 74                  | 13.5 | 192   | 13.3 |
| 20-24              | 341               | 45.4 | 268                 | 35.6 | 588   | 40.7 |
| 25-29              | 181               | 24.1 | 219                 | 31.6 | 400   | 27.7 |
| 30-34              | 110               | 14.6 | 100                 | 14.4 | 210   | 14.5 |
| >=35               | 22                | 2.9  | 35                  | 4.9  | 56    | 3.9  |
| Residence          |                   |      |                     |      |       |      |
| Urban              | 577               | 76.8 | 407                 | 58.7 | 984   | 68.1 |
| Rural              | 174               | 23.2 | 287                 | 41.4 | 461   | 31.9 |
| Number of children |                   |      |                     |      |       |      |
| None               | 298               | 40.0 | 254                 | 36.8 | 552   | 38.4 |
| 1-5                | 422               | 56.6 | 401                 | 58.1 | 823   | 57.3 |
| 6-10               | 26                | 3.5  | 35                  | 5.1  | 61    | 4.3  |
| Trimester of visit |                   |      |                     |      |       |      |
| First              | 223               | 29.7 | 143                 | 20.6 | 366   | 25.3 |
| Second             | 416               | 55.3 | 242                 | 34.8 | 658   | 45.5 |
| Third              | 113               | 15.0 | 310                 | 44.6 | 423   | 29.2 |
| Comorbidities      |                   |      |                     |      |       |      |
| None               | 750               | 99.7 | 689                 | 99.1 | 1,439 | 99.5 |
| At least one*      | 2                 | 0.3  | 6                   | 0.9  | 8     | 0.6  |
| COVID symptoms†    |                   |      |                     |      |       |      |
| No                 | 721               | 96.4 | 668                 | 96.5 | 1,389 | 96.5 |
| Yes                | 27                | 3.6  | 24                  | 3.5  | 51    | 3.5  |

373

374 \* chronic liver, renal, cardiovascular or 'other' disease

375 † at least one of cough, fever, headache or difficulty breathing

377 Table 2. Seroprevalence of Anti-SARS-CoV-2 antibodies by participant characteristics.

| Characteristics      | Tested<br>N | Sero-<br>positive<br>n | Sero-<br>prevalence<br>% | $\chi^2$ test |
|----------------------|-------------|------------------------|--------------------------|---------------|
| Age in years         |             |                        |                          |               |
| 14-19                | 192         | 7                      | 3.7                      | p=0.19        |
| 20-24                | 588         | 42                     | 7.1                      |               |
| 25-29                | 400         | 24                     | 6.0                      |               |
| 30-34                | 210         | 9                      | 4.3                      |               |
| >=35                 | 56          | 1                      | 1.8                      |               |
| ANC clinic           |             |                        |                          |               |
| Hiwot Fana Hospital  | 695         | 35                     | 5.0                      | p=0.26        |
| Haramaya Hospital    | 19          | 0                      | 0.0                      |               |
| Awoday Health Centre | 733         | 48                     | 6.6                      |               |
| Residence            |             |                        |                          |               |
| Urban                | 984         | 57                     | 5.8                      | p=0.91        |
| Rural                | 461         | 26                     | 5.6                      |               |
| Number of children   |             |                        |                          |               |
| None                 | 520         | 32                     | 5.8                      | P=0.370       |
| 1-5                  | 778         | 45                     | 5.5                      |               |
| 6-10                 | 55          | 6                      | 9.8                      |               |
| Trimester of visit   |             |                        |                          |               |
| First                | 366         | 31                     | 8.5                      | p=0.034       |
| Second               | 658         | 32                     | 4.9                      |               |
| Third                | 423         | 20                     | 4.8                      |               |
| Comorbidities        |             |                        |                          |               |
| None                 | 1,439       | 81                     | 5.6                      | p=0.019       |
| At least one*        | 8           | 2                      | 25.0                     |               |
| COVID symptoms†      |             |                        |                          |               |
| No                   | 1,389       | 82                     | 5.9                      | p=0.24        |
| Yes                  | 51          | 1                      | 2.0                      |               |

378

379 \* chronic liver, renal, cardiovascular or 'other' disease

380 † at least one of cough, fever, headache or difficulty breathing

381

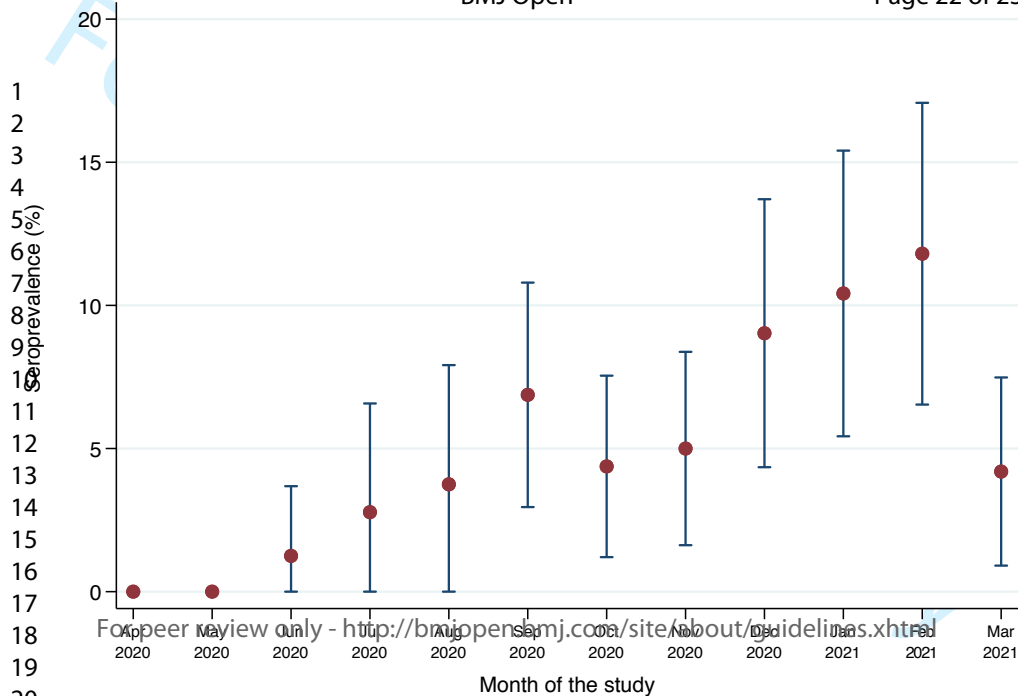



# Seroprevalence of anti-SARS-CoV-2 antibodies in women attending antenatal care in eastern Ethiopia

## STROBE Statement—Checklist of items that should be included in reports of *cross-sectional studies*

|                           | Item No | Recommendation                                                                                                                                                                                    | Page No |
|---------------------------|---------|---------------------------------------------------------------------------------------------------------------------------------------------------------------------------------------------------|---------|
| <b>Title and abstract</b> | 1       | (a) Indicate the study's design with a commonly used term in the title or the abstract                                                                                                            | 1       |
|                           |         | (b) Provide in the abstract an informative and balanced summary of what was done and what was found                                                                                               | 1       |
| <b>Introduction</b>       |         |                                                                                                                                                                                                   |         |
| Background/rationale      | 2       | Explain the scientific background and rationale for the investigation being reported                                                                                                              | 4       |
| Objectives                | 3       | State specific objectives, including any prespecified hypotheses                                                                                                                                  | 4-5     |
| <b>Methods</b>            |         |                                                                                                                                                                                                   |         |
| Study design              | 4       | Present key elements of study design early in the paper                                                                                                                                           | 5       |
| Setting                   | 5       | Describe the setting, locations, and relevant dates, including periods of recruitment, exposure, follow-up, and data collection                                                                   | 5       |
| Participants              | 6       | (a) Give the eligibility criteria, and the sources and methods of selection of participants                                                                                                       | 5-6     |
| Variables                 | 7       | Clearly define all outcomes, exposures, predictors, potential confounders, and effect modifiers. Give diagnostic criteria, if applicable                                                          | 6       |
| Data sources/measurement  | 8*      | For each variable of interest, give sources of data and details of methods of assessment (measurement). Describe comparability of assessment methods if there is more than one group              | 7       |
| Bias                      | 9       | Describe any efforts to address potential sources of bias                                                                                                                                         | 7       |
| Study size                | 10      | Explain how the study size was arrived at                                                                                                                                                         | 5       |
| Quantitative variables    | 11      | Explain how quantitative variables were handled in the analyses. If applicable, describe which groupings were chosen and why                                                                      | 6-7     |
| Statistical methods       | 12      | (a) Describe all statistical methods, including those used to control for confounding                                                                                                             | 7       |
|                           |         | (b) Describe any methods used to examine subgroups and interactions                                                                                                                               | 7       |
|                           |         | (c) Explain how missing data were addressed                                                                                                                                                       | 7       |
|                           |         | (d) If applicable, describe analytical methods taking account of sampling strategy                                                                                                                | 7       |
|                           |         | (e) Describe any sensitivity analyses                                                                                                                                                             | 7       |
| <b>Results</b>            |         |                                                                                                                                                                                                   |         |
| Participants              | 13*     | (a) Report numbers of individuals at each stage of study—eg numbers potentially eligible, examined for eligibility, confirmed eligible, included in the study, completing follow-up, and analysed | 8       |
|                           |         | (b) Give reasons for non-participation at each stage                                                                                                                                              | 8       |
|                           |         | (c) Consider use of a flow diagram                                                                                                                                                                | -       |
| Descriptive data          | 14*     | (a) Give characteristics of study participants (eg demographic, clinical, social) and information on exposures and potential confounders                                                          | 8-10    |
|                           |         | (b) Indicate number of participants with missing data for each variable of interest                                                                                                               | 8       |
| Outcome data              | 15*     | Report numbers of outcome events or summary measures                                                                                                                                              | 8-9     |

## Seroprevalence of anti-SARS-CoV-2 antibodies in women attending antenatal care in eastern Ethiopia

|                          |    |                                                                                                                                                                                                              |       |
|--------------------------|----|--------------------------------------------------------------------------------------------------------------------------------------------------------------------------------------------------------------|-------|
| Main results             | 16 | (a) Give unadjusted estimates and, if applicable, confounder-adjusted estimates and their precision (eg, 95% confidence interval). Make clear which confounders were adjusted for and why they were included | 8-9   |
|                          |    | (b) Report category boundaries when continuous variables were categorized                                                                                                                                    | 9     |
|                          |    | (c) If relevant, consider translating estimates of relative risk into absolute risk for a meaningful time period                                                                                             | -     |
| Other analyses           | 17 | Report other analyses done—eg analyses of subgroups and interactions, and sensitivity analyses                                                                                                               | 9     |
| <b>Discussion</b>        |    |                                                                                                                                                                                                              |       |
| Key results              | 18 | Summarise key results with reference to study objectives                                                                                                                                                     | 9-10  |
| Limitations              | 19 | Discuss limitations of the study, taking into account sources of potential bias or imprecision. Discuss both direction and magnitude of any potential bias                                                   | 10    |
| Interpretation           | 20 | Give a cautious overall interpretation of results considering objectives, limitations, multiplicity of analyses, results from similar studies, and other relevant evidence                                   | 10-12 |
| Generalisability         | 21 | Discuss the generalisability (external validity) of the study results                                                                                                                                        | 11-12 |
| <b>Other information</b> |    |                                                                                                                                                                                                              |       |
| Funding                  | 22 | Give the source of funding and the role of the funders for the present study and, if applicable, for the original study on which the present article is based                                                | 16    |

\*Give information separately for exposed and unexposed groups.

**Note:** An Explanation and Elaboration article discusses each checklist item and gives methodological background and published examples of transparent reporting. The STROBE checklist is best used in conjunction with this article (freely available on the Web sites of PLoS Medicine at <http://www.plosmedicine.org/>, Annals of Internal Medicine at <http://www.annals.org/>, and Epidemiology at <http://www.epidem.com/>). Information on the STROBE Initiative is available at [www.strobe-statement.org](http://www.strobe-statement.org).

# BMJ Open

## Seroprevalence of anti-SARS-CoV-2 antibodies in women attending antenatal care in eastern Ethiopia: a facility-based surveillance

|                                 |                                                                                                                                                                                                                                                                                                                                                                                                               |
|---------------------------------|---------------------------------------------------------------------------------------------------------------------------------------------------------------------------------------------------------------------------------------------------------------------------------------------------------------------------------------------------------------------------------------------------------------|
| Journal:                        | <i>BMJ Open</i>                                                                                                                                                                                                                                                                                                                                                                                               |
| Manuscript ID                   | bmjopen-2021-055834.R1                                                                                                                                                                                                                                                                                                                                                                                        |
| Article Type:                   | Original research                                                                                                                                                                                                                                                                                                                                                                                             |
| Date Submitted by the Author:   | 08-Oct-2021                                                                                                                                                                                                                                                                                                                                                                                                   |
| Complete List of Authors:       | Assefa, Nega; Haramaya University; London School of Hygiene & Tropical Medicine<br>Regassa, Lemma; Haramaya University<br>Teklemariam, Zelalem; Haramaya University<br>Oundo, Joseph; London School of Hygiene & Tropical Medicine<br>Madrid-Castillo, Lola; London School of Hygiene & Tropical Medicine<br>Dessie, Yadeta; Haramaya University<br>Scott, A; London School of Hygiene and Tropical Medicine, |
| <b>Primary Subject Heading</b>: | Epidemiology                                                                                                                                                                                                                                                                                                                                                                                                  |
| Secondary Subject Heading:      | Global health, Public health, Infectious diseases                                                                                                                                                                                                                                                                                                                                                             |
| Keywords:                       | COVID-19, Health policy < HEALTH SERVICES ADMINISTRATION & MANAGEMENT, Protocols & guidelines < HEALTH SERVICES ADMINISTRATION & MANAGEMENT, Infection control < INFECTIOUS DISEASES, Prenatal diagnosis < OBSTETRICS                                                                                                                                                                                         |
|                                 |                                                                                                                                                                                                                                                                                                                                                                                                               |

SCHOLARONE™  
Manuscripts



I, the Submitting Author has the right to grant and does grant on behalf of all authors of the Work (as defined in the below author licence), an exclusive licence and/or a non-exclusive licence for contributions from authors who are: i) UK Crown employees; ii) where BMJ has agreed a CC-BY licence shall apply, and/or iii) in accordance with the terms applicable for US Federal Government officers or employees acting as part of their official duties; on a worldwide, perpetual, irrevocable, royalty-free basis to BMJ Publishing Group Ltd ("BMJ") its licensees and where the relevant Journal is co-owned by BMJ to the co-owners of the Journal, to publish the Work in this journal and any other BMJ products and to exploit all rights, as set out in our [licence](#).

The Submitting Author accepts and understands that any supply made under these terms is made by BMJ to the Submitting Author unless you are acting as an employee on behalf of your employer or a postgraduate student of an affiliated institution which is paying any applicable article publishing charge ("APC") for Open Access articles. Where the Submitting Author wishes to make the Work available on an Open Access basis (and intends to pay the relevant APC), the terms of reuse of such Open Access shall be governed by a Creative Commons licence – details of these licences and which [Creative Commons](#) licence will apply to this Work are set out in our licence referred to above.

Other than as permitted in any relevant BMJ Author's Self Archiving Policies, I confirm this Work has not been accepted for publication elsewhere, is not being considered for publication elsewhere and does not duplicate material already published. I confirm all authors consent to publication of this Work and authorise the granting of this licence.

1  
2  
3  
4  
5 **1 Seroprevalence of anti-SARS-CoV-2 antibodies in women attending antenatal**  
6  
7 **2 care in eastern Ethiopia: a facility-based surveillance**  
8  
9

10 3 Nega Assefa<sup>1, 2, \*</sup>, Lemma Demissie Regassa<sup>1</sup>, Zelalem Teklemariam<sup>1</sup>, Joseph Oundo<sup>2</sup>, Lola  
11  
12 4 Madrid<sup>2</sup>, Yadeta Dessie<sup>1</sup>, J. Anthony G. Scott<sup>2</sup>  
13  
14  
15

16  
17 5 <sup>1</sup> College of Health and Medical Sciences, Haramaya University, Ethiopia  
18  
19

20 6 <sup>2</sup> London School of Hygiene & Tropical Medicine, UK  
21  
22  
23  
24

25 9 \* Corresponding author  
26  
27

28 10 Nega Assefa  
29  
30

31 11 Email: [negaassefa@yahoo.com](mailto:negaassefa@yahoo.com)  
32  
33

34 13 Contact address  
35  
36

37 14 NA: [negaassefa@yahoo.com](mailto:negaassefa@yahoo.com)  
38  
39

40 15 LDR: [esraeldemiss@gmail.com](mailto:esraeldemiss@gmail.com)  
41  
42

43 16 ZT: [zelalemtmariam@yahoo.com](mailto:zelalemtmariam@yahoo.com)  
44  
45

46 17 LM: [lola.madrid-castillo@lshtm.ac.uk](mailto:lola.madrid-castillo@lshtm.ac.uk)  
47  
48

49 18 JO: [joseph.oundo@lshtm.ac.uk](mailto:joseph.oundo@lshtm.ac.uk)  
50  
51

52 19 YD: [yad\\_de2005@yahoo.com](mailto:yad_de2005@yahoo.com)  
53  
54

55 20 JAGS: [anthony.scott@lshtm.ac.uk](mailto:anthony.scott@lshtm.ac.uk)  
56  
57

58  
59  
60

22  
23  
24 Word counts

25 Abstract 245

26 Main text 2489  
27  
28

## 29 Abstract

30 **Objective:** We conducted serosurveillance of anti-SARS-CoV-2 antibodies among pregnant  
31 women attending their first antenatal care.

32 **Setting:** The surveillance was set in one referral hospital in Harar, one district hospital and one  
33 health centre located in Haramaya district in rural eastern Ethiopia.

34 **Participants:** We collected questionnaire data and a blood sample from 3,312 pregnant women  
35 between April 1, 2020 and March 31, 2021. We selected 1,447 blood samples at random and  
36 assayed these for anti-SARS-CoV-2 antibodies at Hararghe Health Research laboratory using  
37 WANTAI® SARS-CoV-2 Rapid Test for total immunoglobulin.

38 **Outcome:** We assayed for anti-SARS-CoV-2 antibodies and temporal trends in seroprevalence  
39 were analysed with a Chi square test for trend and multivariable binomial regression.

40 **Results:** Among 1,447 sera tested, 83 were positive for anti-SARS-CoV-2 antibodies giving a  
41 crude seroprevalence of 5.7% (95% CI 4.6%, 7.0%). Of 160 samples tested in April-May 2020,  
42 none was seropositive; the first seropositive sample was identified in June and seroprevalence rose  
43 steadily thereafter (Chi square test for trend,  $p=0.003$ ) reaching a peak of 11.8% in February 2021.  
44 In the multivariable model, seroprevalence was approximately 3% higher in first-trimester mothers  
45 compared to later presentations, and rose by 0.75% (95% CI 0.31%, 1.20%) per month of calendar  
46 time.

47 **Conclusions:** This clinical convenience sample illustrates the dynamic of the SARS-CoV-2  
48 epidemic in young adults in eastern Ethiopia; infection was rare before June 2020 but it spread in  
49 a linear fashion thereafter, rather than following intermittent waves, and reached 10% by the  
50 beginning of 2021. After one year of surveillance, most pregnant mothers remained susceptible.

1  
2  
3 51 **Keywords:** COVID 19, COVID-19 seroprevalence, COVID-19 among pregnant women, COVID-  
4  
5 52 19 in Ethiopia  
6  
7  
8 53

9  
10 54 **Strengths and limitations**  
11  
12 55

- 13  
14  
15 56 • The surveillance was initiated quickly at the start of the pandemic and was pursued with  
16  
17 57 consistent methods over a full calendar year  
18  
19 58 • Pregnant women are consistently available for surveillance throughout movement restrictions  
20  
21 59 providing a practical and valid survey of seroprevalence trends  
22  
23  
24 60 • Results from pregnant women may not be fully representative of older or younger women,  
25  
26 61 nor of men at any age.  
27  
28  
29 62 • SARS-CoV-2 antibodies were assayed using a lateral flow device which, though convenient,  
30  
31 63 has inferior performance characteristics to ELISA  
32  
33  
34  
35 64

## 65 Introduction

66 In Ethiopia, the first case of COVID-19 was reported on 13 March 2020. By the end of March  
67 2021, there were 206,589 reports of COVID-19 infection and 2,865 coronavirus-related deaths. In  
68 a country with an estimated population, in 2019, of 112 million this represents a cumulative  
69 incidence of SARS-CoV-2 infection of only 0.2% after a full year of transmission. Many cases of  
70 COVID-19 present with mild symptoms and, in Ethiopia, three quarters of PCR-positive cases  
71 have no symptoms [1 2](#). Access to PCR testing in Ethiopia is also sparse. Monitoring the epidemic  
72 by detecting symptomatic cases is, therefore, highly insensitive. In these circumstances,  
73 seroprevalence of anti-SARS-CoV-2 antibodies can provide a more accurate estimator of  
74 cumulative incidence. Undertaking community sero-sampling during the pandemic is difficult  
75 when travel and household access are constrained by control measures. Expectant mothers,  
76 however, are likely to continue to seek health services throughout the pandemic and they can be  
77 used as a continuously available proxy population to estimate the cumulative incidence among  
78 young adults [3-5](#). In addition, serological surveillance is simple to implement at Antenatal Clinic  
79 (ANC) visits because anti-SARS-CoV-2 antibodies can be assayed in the residual blood volumes  
80 of routine samples collected for clinical screening for anaemia and maternal infectious diseases.

81 Planning and provision of health care during a major epidemic like COVID-19 pose substantial  
82 logistical and clinical challenges. Information on the shape of the epidemic curve is critical to  
83 inform public health responses. The dynamics of seroprevalence reflect the epidemic curve and  
84 can provide an estimate of the effective reproduction number. Seroprevalence also indicates the  
85 likelihood of approaching transmission control through population immunity. This study aimed to  
86 assess the trend in seroprevalence of anti-SARS-CoV-2 antibodies throughout the first year of the



1  
2  
3 87 epidemic by assaying anti-SARS-CoV-2 antibodies among pregnant women attending ANC at  
4  
5 88 three different health facilities in the area around Harar, eastern Ethiopia.  
6  
7  
8  
9

## 10 89 **Material and methods**

### 11 12 13 90 **Study area and period**

14  
15 91 The surveillance was conducted between April 1, 2020 and March 31, 2021 at Awoday Health  
16  
17 92 Centre and Haramaya District Hospital, both in Haramaya District, and in Hiwot Fana Specialized  
18  
19 93 Referral University Hospital in Harar. Hiwot Fana is the largest referral and teaching hospital in  
20  
21 94 eastern Ethiopia and receives tertiary referrals from Harari region, East Oromia, Somali region,  
22  
23 95 and Dire Dawa City. It is one of the ten regional centres designated by the Federal Ministry of  
24  
25 96 Health to manage the COVID-19 epidemic. Haramaya Hospital was rapidly designated a COVID-  
26  
27 97 19 treatment facility and women seeking ANC services were therefore referred to Awoday Health  
28  
29 98 Centre after April 16, 2020. Ethiopia began to roll out COVID-19 vaccine in the first quarter of  
30  
31 99 2021; however, no doses were given in the study area during the period this analysis covers.  
32  
33  
34  
35  
36  
37

### 38 100 **Study design, population and sample size**

39  
40 101 At the end of March 2020, we integrated Health facility-based surveillance into the routine clinical  
41  
42 102 care of pregnant women at Hiwot Fana Hospital, Awoday Health Centre and Haramaya Hospital.  
43  
44 103 The study population comprised 3306 pregnant women attending their first antenatal care in these  
45  
46 104 three facilities during the surveillance period. Because we had fewer test kits available than there  
47  
48 105 were samples available from the clinic, we selected a random sample for analysis stratified on  
49  
50 106 month. Initially, we decided to select 144 samples per month; as the seroprevalence was very low  
51  
52 107 in the first three months we reset the sample size to 80 per month from July onwards and increased  
53  
54  
55  
56  
57  
58  
59  
60

1  
2  
3 108 it to 160 per month in December once the seroprevalence reached 5%. In October, the number of  
4  
5 109 samples collected was lower than the desired sample size and we therefore tested all of the samples  
6  
7  
8 110 (See Supplementary table).  
9

10  
11  
12 111 A total of 78 women were excluded because they were not willing to provide a blood sample.  
13  
14 112 Routine antenatal care includes serological screening for HIV, syphilis, and toxoplasma infection  
15  
16 113 during pregnancy undertaken in two blood samples; the first blood sample is taken at 16 weeks'  
17  
18 114 gestation or at the first ANC visit, if later.  
19  
20

21  
22  
23 115 Socio-demographic data and information on pregnancy, clinical symptoms of COVID-19 and co-  
24  
25 116 morbidities was collected by trained nurses. COVID-19 symptoms were defined as at least one of  
26  
27 117 cough, fever, headache or difficulty breathing. Data quality and completeness were checked daily.  
28  
29  
30

### 31 32 118 **Laboratory analyses** 33

34 119 For the anti-SARS-CoV-2 antibodies test, residual blood samples from the routine ANC tests were  
35  
36 120 transferred to a test-tube containing clot activator by trained medical laboratory technologists  
37  
38 121 working in each health facility. The blood samples were allowed to clot and serum was separated  
39  
40 122 by centrifugation at 3000 RPM for 10 minutes. Serum samples were stored at 2-8°C at each site  
41  
42 123 and transported in cool boxes to Hararghe Health Research Laboratory where they were stored at  
43  
44 124 -80°C.  
45  
46  
47  
48  
49

50 125 Samples were tested using WANTAI® SARS-CoV-2 Ab Rapid Test. The test is a lateral flow  
51  
52 126 assay in a cassette format designed for the qualitative detection of total antibodies to SARS-CoV-2  
53  
54 127 in human serum. The receptor-binding domain of the SARS-CoV-2 spike protein is bound at the  
55  
56  
57

1  
2  
3 128 Test Zone (T) and antibodies are bound at the Control Zone (C) of the cassette. The test has a  
4  
5 129 sensitivity of 100% and specificity of 98.8% under validation performed by the manufacturer [6](#);  
6  
7  
8 130 independent validation of the test found a sensitivity of 89% [7](#). All the stored serum samples, tests  
9  
10 131 reagents and cassettes were brought to room temperature (15-30°C) thirty minutes before  
11  
12 132 performing the test and checked for defects. Then, a 10µl of serum specimen and two drops of  
13  
14 133 diluent buffer were added into the specimen window. Results were read and interpreted as  
15  
16 134 reactive/positive (Red line on C and T) or non-reactive/negative (Red line on C) after 15-20  
17  
18 135 minutes according to manufacturer's instruction [67](#). Serum samples taken  $\geq 14$  days after a positive  
19  
20 136 PCR test from COVID-19 infected individuals were used as positive control. Samples were tested  
21  
22 137 in batches of 50-60 by a single operator. Assays without a valid reaction on the control line were  
23  
24 138 rejected and the assay repeated on a new kit.  
25  
26  
27  
28  
29

### 30 139 **Patient and Public Involvement statement**

31  
32 140 Because the surveillance was set up urgently at the beginning of the pandemic we were not able to  
33  
34 141 involve participants or the public in the design or set-up and because it was designed as an  
35  
36 142 anonymous surveillance we were not able to provide individual feedback of the results to the  
37  
38 143 participants. We have provided feedback of these high-level results through our existing  
39  
40 144 community engagement exercises, including local radio programmes, meetings with local leaders  
41  
42 145 and communication through health workers for onward dissemination.  
43  
44  
45  
46  
47

### 48 146 **Statistical analysis**

49  
50 147 We used STATA version 16.0 for statistical management and analysis. We selected a random  
51  
52 148 sample of participants each month using the runiform function. We estimated unadjusted  
53  
54 149 seroprevalence of SARS-CoV-2 IgG antibody with a 95% confidence interval (CI). We did not  
55  
56  
57

1  
2  
3 150 make adjustment for the test performance characteristics because the manufacturer's validation  
4  
5 151 assay, found very high sensitivity and specificity. We examined the univariate association between  
6  
7 152 individual characteristics and seropositivity using Chi-square test and multivariable associations  
8  
9  
10 153 using binomial regression. The trend in seropositivity with time was tested with a Chi-square test  
11  
12 154 for trend and in the multivariable model. Data used in the analysis is available at  
13  
14  
15 155 [dataverse.harvard.edu](http://dataverse.harvard.edu) [8](#).

### 19 156 **Ethical consideration**

21 157 The surveillance was confined to residual clinical blood sample testing and anonymized data were  
22  
23 158 collected using checklists to extract data from ANC cards. Bar codes, representing an anonymous  
24  
25  
26 159 unique identity number, were used to link extracted clinical and demographic data with test sample  
27  
28 160 results. The exercise was conducted as part of a public health surveillance, with the approval of  
29  
30  
31 161 the directors of each of the three health facilities, and the results were made available to health  
32  
33 162 facilities, the Regional Health Bureau (Harari and Oromia) and the Ethiopian Public Health  
34  
35 163 Institute (EPHI). All ANC attendees were informed that the clinic was participating in an  
36  
37 164 anonymous surveillance and mothers were made aware that the residual volumes of their blood  
38  
39  
40 165 samples would be made available to the surveillance laboratory. Written individual informed  
41  
42 166 consent was not obtained. The surveillance exercise was approved by the Institutional Health  
43  
44 167 Research Ethical Review Committee of the College of Health and Medical Sciences, Haramaya  
45  
46  
47 168 University, Ethiopia with clearance number 123/2021.

## 169 **Results**

### 170 **Demographic characteristics of the study participants**

171 Between April 1, 2020 and March 31, 2021 there were 3,313 first visits to the antenatal clinics;  
172 1,532 (46.24%) at Hiwot Fana Hospital, 1781 (53.75%) at Awoday Health Centre and Haramaya  
173 Hospital. At these, we interviewed and collected blood samples from 3,312 women. We tested a  
174 random sample of 1,447 blood specimens (Table 1); 752 (52%) were from Haramaya District  
175 (Awoday Health Centre and Haramaya Hospital) and 695 (48%) were from Hiwot Fana Hospital;  
176 984 (68%) were urban residents.

177 Among the population sample tested, the mean (SD) age was 23.9 (4.7) years and ages ranged  
178 from 15 to 45 years. The mean (SD) number of children per mother was 1.5 (1.8). The median  
179 (IQR) gestational age at the first antenatal visit was 20 (13-28) weeks. Only 51 (3.5%) had COVID-  
180 19 symptoms at the time of sampling and 8 (<1%) had a history of comorbidity, given as chronic  
181 liver, renal, cardiovascular or 'other' disease. Respiratory diseases, chronic neurological disease,  
182 diabetes mellitus, and cancer were not reported by any participant.

### 183 **Seroprevalence of SARS-CoV-2 antibodies**

184 Of 1,447 samples tested, 83 (5.7%, 95% CI 4.6, 7.0%) were positive for anti-SARS-CoV-2  
185 antibodies. The first seropositive sample was identified on June 11, 2020, and seroprevalence rose  
186 progressively thereafter, with the exception of March 2021, where it dropped sharply (chi-square  
187 for trend for the whole year,  $p=0.003$ ; Figure 1).

1  
2  
3 188 Seroprevalence also varied significantly by trimester of pregnancy and co-morbidity but not by  
4  
5 189 clinic, residence or COVID-19 symptoms (Table 2). Given the linear growth in seroprevalence  
6  
7 190 (Figure 1) and better model fit based on Bayesian information criterion, we modelled prevalence  
8  
9 191 associations as risk differences rather than risk ratios. In a multivariable binomial regression  
10  
11 192 model, the prevalence difference was -3.2% (95% CI -6.7, -0.4%) and -3.0% (95% CI -6.8,-0.8%)  
12  
13 193 among women in their second and third trimesters, respectively, compared with those in the first  
14  
15 194 trimester and the prevalence difference was 0.75% (95% CI 0.31, 1.20%) per month of calendar  
16  
17 195 time.  
18  
19  
20  
21  
22  
23

## 24 196 **Discussion**

25  
26 197 The study provides a simple description of the dynamic of SARS-CoV-2 epidemic in an area where  
27  
28 198 reliable data are extremely rare. In a population of attendees at antenatal clinics in three sites in  
29  
30 199 eastern Ethiopia, antibodies against SARS-CoV-2 first appeared in June 2020 and seroprevalence  
31  
32 200 rose steadily month on month reaching approximately 10% at the beginning of 2021. Although the  
33  
34 201 point estimate for March 2021 is substantially lower, the data as a whole evince a strong linear  
35  
36 202 trend and this single estimate is most likely to have deviated from the general direction by chance.  
37  
38 203 If these results are reliable, they indicate that the epidemic is progressing here at a considerably  
39  
40 204 lower rate than in other settings in East Africa and that the greater majority of the population  
41  
42 205 remains uninfected, suggesting that the epidemic is still at an early stage.  
43  
44  
45  
46  
47  
48

49 206 The principal limitations of the study are the potential generalisability of the population under  
50  
51 207 surveillance and the validity of the serological assay employed. Pregnant women have been used  
52  
53 208 as an indicator population in prior pandemics, including HIV [9](#), but also for SARS-CoV-2, both in  
54  
55  
56  
57  
58  
59  
60

1  
2  
3 209 high-income settings [4 5 10-14](#) and low- and middle-income settings, including in neighbouring  
4  
5 210 Kenya [3](#). The principal advantage of sampling pregnant women is that they remain one of the few  
6  
7  
8 211 patient groups for whom health services cannot be postponed until after the pandemic has passed.  
9  
10 212 They are permitted and encouraged to attend even in the face of social and movement restrictions,  
11  
12 213 and so provide a consistent and reliable sampling group. The principal limitation of this group is  
13  
14 214 their restriction on age and sex, however, in most settings, including other East African countries,  
15  
16 215 seroprevalence does not vary significantly by sex and the cumulative incidence in women is likely  
17  
18  
19 216 to represent the infection history of both sexes [15-20](#). Similarly, in most settings young adults are  
20  
21 217 the group most likely to be infected by SARS-CoV-2 and so the seroprevalence estimates here are  
22  
23 218 likely to represent the highest risk in the whole population; other age groups, particularly children  
24  
25 219 and the elderly, are likely to have lower seroprevalence [17 21](#).

26  
27  
28  
29  
30 220 The World Health Organization has deprecated the use of rapid tests for SARS-CoV-2 antibodies  
31  
32 221 for individual diagnosis but recognises their potential value in research [22](#). WHO has also  
33  
34 222 recommended and endorsed quantitative analysis of IgG antibodies using ELISA and has  
35  
36 223 distributed the WANTAI ELISA kit to countries undertaking serosurveillance. Reliance on  
37  
38 224 ELISA, however, limits the range of settings in which serosurveillance can be undertaken and  
39  
40 225 lateral flow tests have been successfully employed for recurrent community-based nationwide  
41  
42 226 surveys in the UK [23](#). When seroprevalence is low, as at the beginning of our study, an assay with  
43  
44 227 imperfect specificity may detect more false positives than true positives. The specificity of the  
45  
46 228 WANTAI rapid test has been estimated by the manufacturer at 98.8%. We assayed 80 samples  
47  
48 229 each month in April and May 2020 without observing a single positive test, suggesting that the  
49  
50 230 specificity is indeed very high. Even if the positive results identified in June included false  
51  
52  
53  
54  
55  
56  
57  
58  
59  
60

1  
2  
3 231 positives, the progressive rise in seropositivity with time is most unlikely to be influenced  
4  
5 232 materially by a small fraction of false positive results.  
6  
7  
8  
9

10 233 The assay sensitivity may also be imperfect in detecting prior infection because the assay was  
11  
12 234 originally calibrated against sera from symptomatic cases, who generally have higher antibody  
13  
14 235 levels than asymptomatic individuals [24](#), and because pregnant women who were infected several  
15  
16 236 months ago may have experienced waning of antibody levels and seroreversion [25-29](#). In general,  
17  
18 237 seroreversion is less problematic in assays that measure total immunoglobulin and in those that  
19  
20 238 target spike antigens, compared to nucleocapsid antigens [27 30](#), so problem of waning in this study  
21  
22 239 is unlikely to be substantial. Furthermore, if sensitivity is unlikely to decline over time, imperfect  
23  
24 240 sensitivity would not affect the shape of the rising seroprevalence line, though it would  
25  
26 241 underestimate the gradient. If, as estimated in one validation study, the WANTAI rapid test has a  
27  
28 242 sensitivity of only 89% [7](#), adjustment for test-performance characteristics would elevate our  
29  
30 243 reported seroprevalence results by a factor of 1.12.  
31  
32  
33  
34  
35  
36

37 244 The results are in contrast to most other settings studied which record a sharp take-off in  
38  
39 245 seroprevalence once transmission begins, often rising quickly to high levels. In Kenya for example,  
40  
41 246 women attending an ANC clinic in Kilifi had seroprevalence of 0%, 2% and 11% in consecutive  
42  
43 247 months September-November 2021; those attending ANC clinic in Nairobi had a seroprevalence  
44  
45 248 of 50% in August 2020 [3](#). The pattern illustrated in eastern Ethiopia is more indicative of a  
46  
47 249 gradually spreading epidemic curve suggesting an effective reproduction number much closer to  
48  
49  
50  
51 250 1.  
52  
53  
54  
55  
56  
57  
58  
59  
60



1  
2  
3 251 In Juba, South Sudan, seroprevalence was 22% in a household survey in August-September 2020  
4  
5 252 [20](#); in Kenya, a national estimate for seroprevalence, based on testing blood transfusion donors,  
6  
7 253 was 4.3% in May 2020 [18](#) and 9.1% two months later [15](#). Health Care Workers in Nairobi, Kenya,  
8  
9 254 had a seroprevalence of 44% in August 2020; those in two rural hospitals had seroprevalence of  
10  
11 255 12-13% in November 2020 [15](#). Finally, in Addis Ababa seroprevalence, estimated in May 2020,  
12  
13 256 was 3.0% [31](#). Although all these studies used different laboratory assays and varied statistical  
14  
15 257 adjustments, collectively, they suggest that transmission in eastern Ethiopia began later than in  
16  
17 258 much of the rest of the region, including the state capital, and has progressed more slowly.  
18  
19  
20  
21  
22  
23

## 24 259 **Conclusion**

25  
26 260 In summary, if seroprevalence is a reliable indicator of cumulative incidence, SARS-CoV-2  
27  
28 261 infection is spreading slowly but steadily in eastern Ethiopia. This contrasts sharply with the  
29  
30 262 recurrent waves of PCR-positive infections apparent in the national surveillance system. One year  
31  
32 263 after the start of the epidemic, approximately 10% of women attending antenatal clinics are  
33  
34 264 seropositive implying that the COVID-19 epidemic is still at an early stage in eastern Ethiopia.  
35  
36  
37  
38  
39  
40  
41  
42

43 266 **[Dataset]** [8] Assefa N, Demissie L, Teklemariam Z, Oundo J, Madrid L, Dessie Y, et al. *Data*  
44  
45 267 *from: Seroprevalence of anti-SARS-CoV-2 antibodies in women attending antenatal care in*  
46  
47 268 *eastern Ethiopia: V1 ed: Harvard Dataverse; June 9, 2021. doi:10.7910/DVN/XIWCXN*  
48  
49  
50  
51  
52  
53  
54  
55  
56  
57  
58  
59  
60

269 **References**

- 270 1. Abdela SG, Abegaz SH, Demsiss W, et al. Clinical Profile and Treatment of COVID-19  
271 Patients: Experiences from an Ethiopian Treatment Center. *Am J Trop Med Hyg* 2020 doi:  
272 10.4269/ajtmh.20-1356 [published Online First: 2021/01/01]
- 273 2. Abraha HE, Gessesse Z, Gebrecherkos T, et al. Clinical features and risk factors associated with  
274 morbidity and mortality among patients with COVID-19 in northern Ethiopia. *Int J Infect*  
275 *Dis* 2021;105:776-83. doi: 10.1016/j.ijid.2021.03.037 [published Online First: 2021/03/21]
- 276 3. Lucinde R, Mugo D, Bottomley C, et al. Sero-surveillance for IgG to SARS-CoV-2 at antenatal  
277 care clinics in two Kenyan referral hospitals. *medRxiv* 2021:2021.02.05.21250735. doi:  
278 10.1101/2021.02.05.21250735
- 279 4. Lumley SF, Eyre DW, McNaughton AL, et al. SARS-CoV-2 antibody prevalence, titres and  
280 neutralising activity in an antenatal cohort, United Kingdom, 14 April to 15 June 2020.  
281 *Euro Surveill* 2020;25(42) doi: 10.2807/1560-7917.ES.2020.25.41.2001721 [published  
282 Online First: 2020/10/24]
- 283 5. Villalaín C, Herraiz I, Luczkowiak J, et al. Seroprevalence analysis of SARS-CoV-2 in pregnant  
284 women along the first pandemic outbreak and perinatal outcome. *PLoS ONE*  
285 2020;15(11):e0243029. doi: 10.1371/journal.pone.0243029
- 286 6. The WANTAI SARS-CoV-2 Ab Rapid Test. Beijing Wantai Biological Pharmacy Enterprise  
287 Co., Ltd. No.31 Kexueyuan Road, Changping District, Beijing 102206, China. 2020  
288 [Available from: <https://www.fda.gov/media/140030/download> accessed 29-04-2021  
289 2021.
- 290 7. Weidner L, Gänsdorfer S, Unterweger S, et al. Quantification of SARS-CoV-2 antibodies with  
291 eight commercially available immunoassays. *Journal of Clinical Virology*  
292 2020;129:104540. doi: <https://doi.org/10.1016/j.jcv.2020.104540>
- 293 **[Dataset]** 8. Assefa N, Demissie L, Teklemariam Z, et al. *Data from: Seroprevalence of anti-*  
294 *SARS-CoV-2 antibodies in women attending antenatal care in eastern Ethiopia:*  
295 doi:10.7910/DVN/XIWCCN. V1 ed: Harvard Dataverse-June 9, 2021.
- 296 9. Kigadye RM, Klokke A, Nicoll A, et al. Sentinel surveillance for HIV-1 among pregnant women  
297 in a developing country: 3 years' experience and comparison with a population serosurvey.  
298 *AIDS* 1993;7(6):849-55. doi: 10.1097/00002030-199306000-00014 [published Online  
299 First: 1993/06/01]
- 300 10. Cosma S, Borella F, Carosso A, et al. The "scar" of a pandemic: Cumulative incidence of  
301 COVID-19 during the first trimester of pregnancy. *Journal of medical virology*  
302 2021;93(1):537-40. doi: 10.1002/jmv.26267 [published Online First: 2020/07/08]
- 303 11. Crovetto F, Crispi F, Llurba E, et al. Seroprevalence and presentation of SARS-CoV-2 in  
304 pregnancy. *Lancet* 2020;396(10250):530-31. doi: 10.1016/S0140-6736(20)31714-1  
305 [published Online First: 2020/08/11]
- 306 12. Flannery DD, Gouma S, Dhudasia MB, et al. SARS-CoV-2 seroprevalence among parturient  
307 women in Philadelphia. *Sci Immunol* 2020;5(49) doi: 10.1126/sciimmunol.abd5709  
308 [published Online First: 2020/07/31]
- 309 13. Haizler-Cohen L, Davidov A, Blitz MJ, et al. Severe acute respiratory syndrome coronavirus  
310 2 antibodies in pregnant women admitted to labor and delivery units. *Am J Obstet Gynecol*  
311 2021;224(1):112-14. doi: 10.1016/j.ajog.2020.09.022 [published Online First: 2020/09/25]

- 1  
2  
3 312 14. Mattern J, Vauloup-Fellous C, Zakaria H, et al. Post lockdown COVID-19 seroprevalence and  
4 313 circulation at the time of delivery, France. *PLoS ONE* 2020;15(10):e0240782. doi:  
5 314 10.1371/journal.pone.0240782 [published Online First: 2020/10/16]  
6  
7 315 15. Adetifa IMO, Uyoga S, Gitonga JN, et al. Temporal trends of SARS-CoV-2 seroprevalence  
8 316 during the first wave of the COVID-19 epidemic in Kenya. *Nature Communications*  
9 317 2021;12(3966) doi: 10.1038/s41467-021-24062-3  
10 318 16. Etyang AO, Lucinde R, Karanja H, et al. Seroprevalence of Antibodies to SARS-CoV-2 among  
11 319 Health Care Workers in Kenya. *Clin Infect Dis* 2021 doi: 10.1093/cid/ciab346 [published  
12 320 Online First: 2021/04/25]  
13 321 17. Pollan M, Perez-Gomez B, Pastor-Barriuso R, et al. Prevalence of SARS-CoV-2 in Spain  
14 322 (ENE-COVID): a nationwide, population-based seroepidemiological study. *Lancet*  
15 323 2020;396(10250):535-44. doi: 10.1016/S0140-6736(20)31483-5 [published Online First:  
16 324 2020/07/10]  
17 325 18. Uyoga S, Adetifa IMO, Karanja HK, et al. Seroprevalence of anti-SARS-CoV-2 IgG antibodies  
18 326 in Kenyan blood donors. *Science* 2021;371(6524):79-82. doi: 10.1126/science.abe1916  
19 327 [published Online First: 2020/11/13]  
20 328 19. Uyoga S, Adetifa IMO, Otiende M, et al. Prevalence of SARS-CoV-2 Antibodies From a  
21 329 National Serosurveillance of Kenyan Blood Donors, January-March 2021. *Jama* 2021 doi:  
22 330 10.1001/jama.2021.15265 [published Online First: 2021/09/03]  
23 331 20. Wiens KE, Mawien PN, Rumunu J, et al. Seroprevalence of anti-SARS-CoV-2 IgG antibodies  
24 332 in Juba, South Sudan: a population-based study. *medRxiv* 2021 doi:  
25 333 10.1101/2021.03.08.21253009 [published Online First: 2021/03/25]  
26 334 21. Murhekar MV, Bhatnagar T, Selvaraju S, et al. SARS-CoV-2 antibody seroprevalence in India,  
27 335 August-September, 2020: findings from the second nationwide household serosurvey. *The*  
28 336 *Lancet Global health* 2021;9(3):e257-e66. doi: 10.1016/S2214-109X(20)30544-1  
29 337 [published Online First: 2021/01/31]  
30 338 22. World Health Organization. Advice on the use of point-of-care immunodiagnostic tests for  
31 339 COVID-19, 2020:[https://www.who.int/news-room/commentaries/detail/advice-on-the-](https://www.who.int/news-room/commentaries/detail/advice-on-the-use-of-point-of-care-immunodiagnostic-tests-for-covid-19)  
32 340 [use-of-point-of-care-immunodiagnostic-tests-for-covid-19](https://www.who.int/news-room/commentaries/detail/advice-on-the-use-of-point-of-care-immunodiagnostic-tests-for-covid-19).  
33 341 23. Moshe M, Daunt A, Flower B, et al. SARS-CoV-2 lateral flow assays for possible use in  
34 342 national covid-19 seroprevalence surveys (React 2): diagnostic accuracy study. *BMJ*  
35 343 (*Clinical research ed*) 2021;372:n423. doi: 10.1136/bmj.n423 [published Online First:  
36 344 2021/03/04]  
37 345 24. Takahashi S, Greenhouse B, Rodriguez-Barraquer I. Are Seroprevalence Estimates for Severe  
38 346 Acute Respiratory Syndrome Coronavirus 2 Biased? *J Infect Dis* 2020;222(11):1772-75.  
39 347 doi: 10.1093/infdis/jiaa523 [published Online First: 2020/08/29]  
40 348 25. Ibarondo FJ, Fulcher JA, Goodman-Meza D, et al. Rapid Decay of Anti-SARS-CoV-2  
41 349 Antibodies in Persons with Mild Covid-19. *The New England journal of medicine*  
42 350 2020;383(11):1085-87. doi: 10.1056/NEJMc2025179 [published Online First:  
43 351 2020/07/25]  
44 352 26. Long QX, Tang XJ, Shi QL, et al. Clinical and immunological assessment of asymptomatic  
45 353 SARS-CoV-2 infections. *Nat Med* 2020;26(8):1200-04. doi: 10.1038/s41591-020-0965-6  
46 354 [published Online First: 2020/06/20]  
47 355 27. Lumley SF, Wei J, O'Donnell D, et al. The duration, dynamics and determinants of SARS-  
48 356 CoV-2 antibody responses in individual healthcare workers. *Clin Infect Dis* 2021 doi:  
49 357 10.1093/cid/ciab004 [published Online First: 2021/01/06]  
50  
51  
52  
53  
54  
55  
56  
57  
58  
59  
60

- 1  
2  
3 358 28. Muecksch F, Wise H, Batchelor B, et al. Longitudinal Serological Analysis and Neutralizing  
4 359 Antibody Levels in Coronavirus Disease 2019 Convalescent Patients. *J Infect Dis*  
5 360 2021;223(3):389-98. doi: 10.1093/infdis/jiaa659 [published Online First: 2020/11/04]  
6 361 29. Ward H, Cooke GS, Atchison C, et al. Prevalence of antibody positivity to SARS-CoV-2  
7 362 following the first peak of infection in England: Serial cross-sectional studies of 365,000  
8 363 adults. *Lancet Reg Health Eur* 2021;4:100098. doi: 10.1016/j.lanepe.2021.100098  
9 364 [published Online First: 2021/05/11]  
10 365 30. Post N, Eddy D, Huntley C, et al. Antibody response to SARS-CoV-2 infection in humans: A  
11 366 systematic review. *PLoS ONE* 2020;15(12):e0244126. doi: 10.1371/journal.pone.0244126  
12 367 [published Online First: 2021/01/01]  
13 368 31. Kempen JH, Abashaw A, Suga HK, et al. SARS-CoV-2 Serosurvey in Addis Ababa, Ethiopia.  
14 369 *Am J Trop Med Hyg* 2020;103(5):2022-23. doi: 10.4269/ajtmh.20-0816 [published Online  
15 370 First: 2020/09/26]  
16 371  
17  
18  
19

### 372 **Author contribution**

20  
21  
22 373 NA and JAGS lead overall Surveillance. NA, JAGS, ZT and LDR develop concept of the  
23 374 Surveillance, analysed the data and wrote the manuscript. ZT provided microbiome data analysis,  
24 375 and interpretation. NA, JAGS, ZT, LDR, LM, JO and YD reviewed the manuscript and give critical  
25 376 feedback. All authors approved the submission of the manuscript to the journal.  
26  
27  
28  
29  
30  
31

### 377 **Competing of interest**

32  
33  
34 378 The authors declare no competing interests.  
35  
36  
37  
38  
39

### 40 379 **Funding:**

41  
42 380 Activities of the surveillance and Laboratory analysis was supported by Emory University as part  
43 381 of the CHAMPS network ([www.champshealth.org](http://www.champshealth.org)). JAGS was funded by The Wellcome Trust  
44 382 through a Senior Research Fellowship (214320).  
45  
46  
47  
48  
49  
50  
51  
52  
53  
54  
55  
56  
57

1  
2  
3 383  
4

5 384 **Data availability**  
6

7  
8 385 Data is available in the following link and can be requested using the form in the link.  
9

10 386 <https://dataverse.harvard.edu/dataset.xhtml?persistentId=doi:10.7910/DVN/XIWCXN>.  
11  
12  
13

14 387 **Acknowledgements**  
15

16 388 Investigators would like to thank authorities of the health facilities for facilitating the surveillance  
17  
18

19 389 and pregnant women for voluntarily participating in the study.  
20  
21  
22

23 390  
24  
25  
26  
27  
28  
29  
30  
31  
32  
33  
34  
35  
36  
37  
38  
39  
40  
41  
42  
43  
44  
45  
46  
47  
48  
49  
50  
51  
52  
53  
54  
55  
56  
57  
58  
59  
60

1  
2  
3 391 **Figure titles/legends**  
4  
5  
6

7 392 Figure 1: Temporal trend of seroprevalence of anti-SARS-CoV-2 antibodies among pregnant  
8  
9  
10 393 women presenting for first antenatal care in 3 ANC facilities, eastern Ethiopia, between April  
11  
12 394 1, 2020 and March 31, 2021  
13  
14  
15

16 395  
17  
18  
19  
20  
21  
22  
23  
24  
25  
26  
27  
28  
29  
30  
31  
32  
33  
34  
35  
36  
37  
38  
39  
40  
41  
42  
43  
44  
45  
46  
47  
48  
49  
50  
51  
52  
53  
54  
55  
56  
57  
58  
59  
60

For peer review only

396 Table 1. Characteristics of 1,447 pregnant mothers attending their first antenatal care at the two  
 397 study clinics between April 2020 and March 2021 and sampled at random for the study.

| Characteristics    | Haramaya District |      | Hiwot Fana Hospital |      | Total |      |
|--------------------|-------------------|------|---------------------|------|-------|------|
|                    | n                 | %    | n                   | %    | n     | %    |
| Age in years       |                   |      |                     |      |       |      |
| 14-19              | 98                | 13.0 | 74                  | 13.5 | 192   | 13.3 |
| 20-24              | 341               | 45.4 | 268                 | 35.6 | 588   | 40.7 |
| 25-29              | 181               | 24.1 | 219                 | 31.6 | 400   | 27.7 |
| 30-34              | 110               | 14.6 | 100                 | 14.4 | 210   | 14.5 |
| >=35               | 22                | 2.9  | 35                  | 4.9  | 56    | 3.9  |
| Residence          |                   |      |                     |      |       |      |
| Urban              | 577               | 76.8 | 407                 | 58.7 | 984   | 68.1 |
| Rural              | 174               | 23.2 | 287                 | 41.4 | 461   | 31.9 |
| Number of children |                   |      |                     |      |       |      |
| None               | 298               | 40.0 | 254                 | 36.8 | 552   | 38.4 |
| 1-5                | 422               | 56.6 | 401                 | 58.1 | 823   | 57.3 |
| 6-10               | 26                | 3.5  | 35                  | 5.1  | 61    | 4.3  |
| Trimester of visit |                   |      |                     |      |       |      |
| First              | 223               | 29.7 | 143                 | 20.6 | 366   | 25.3 |
| Second             | 416               | 55.3 | 242                 | 34.8 | 658   | 45.5 |
| Third              | 113               | 15.0 | 310                 | 44.6 | 423   | 29.2 |
| Comorbidities      |                   |      |                     |      |       |      |
| None               | 750               | 99.7 | 689                 | 99.1 | 1,439 | 99.5 |
| At least one*      | 2                 | 0.3  | 6                   | 0.9  | 8     | 0.6  |
| COVID symptoms†    |                   |      |                     |      |       |      |
| No                 | 721               | 96.4 | 668                 | 96.5 | 1,389 | 96.5 |
| Yes                | 27                | 3.6  | 24                  | 3.5  | 51    | 3.5  |

398

399 \* chronic liver, renal, cardiovascular or 'other' disease

400 † at least one of cough, fever, headache or difficulty breathing

402 Table 2. Seroprevalence of Anti-SARS-CoV-2 antibodies by participant characteristics.

| Characteristics      | Tested N | Sero-positive n | Sero-prevalence % | Chi-square test p value |
|----------------------|----------|-----------------|-------------------|-------------------------|
| Age in years         |          |                 |                   |                         |
| 14-19                | 192      | 7               | 3.7               | 0.19                    |
| 20-24                | 588      | 42              | 7.1               |                         |
| 25-29                | 400      | 24              | 6.0               |                         |
| 30-34                | 210      | 9               | 4.3               |                         |
| >=35                 | 56       | 1               | 1.8               |                         |
| ANC clinic           |          |                 |                   |                         |
| Hiwot Fana Hospital  | 695      | 35              | 5.0               | 0.260                   |
| Haramaya Hospital    | 19       | 0               | 0.0               |                         |
| Awoday Health Centre | 733      | 48              | 6.6               |                         |
| Residence            |          |                 |                   |                         |
| Urban                | 984      | 57              | 5.8               | 0.910                   |
| Rural                | 461      | 26              | 5.6               |                         |
| Number of children   |          |                 |                   |                         |
| None                 | 520      | 32              | 5.8               | 0.370                   |
| 1-5                  | 778      | 45              | 5.5               |                         |
| 6-10                 | 55       | 6               | 9.8               |                         |
| Trimester of visit   |          |                 |                   |                         |
| First                | 366      | 31              | 8.5               | 0.034                   |
| Second               | 658      | 32              | 4.9               |                         |
| Third                | 423      | 20              | 4.8               |                         |
| Comorbidities        |          |                 |                   |                         |
| None                 | 1,439    | 81              | 5.6               | 0.019                   |
| At least one*        | 8        | 2               | 25.0              |                         |
| COVID symptoms†      |          |                 |                   |                         |
| No                   | 1,389    | 82              | 5.9               | 0.240                   |
| Yes                  | 51       | 1               | 2.0               |                         |

403

404 \* chronic liver, renal, cardiovascular or 'other' disease

405 † at least one of cough, fever, headache or difficulty breathing

406





# Seroprevalence of anti-SARS-CoV-2 antibodies in women attending antenatal care in eastern Ethiopia

## STROBE Statement—Checklist of items that should be included in reports of *cross-sectional studies*

|                           | Item No | Recommendation                                                                                                                                                                                    | Page No |
|---------------------------|---------|---------------------------------------------------------------------------------------------------------------------------------------------------------------------------------------------------|---------|
| <b>Title and abstract</b> | 1       | (a) Indicate the study's design with a commonly used term in the title or the abstract                                                                                                            | 1       |
|                           |         | (b) Provide in the abstract an informative and balanced summary of what was done and what was found                                                                                               | 1       |
| <b>Introduction</b>       |         |                                                                                                                                                                                                   |         |
| Background/rationale      | 2       | Explain the scientific background and rationale for the investigation being reported                                                                                                              | 4       |
| Objectives                | 3       | State specific objectives, including any prespecified hypotheses                                                                                                                                  | 4-5     |
| <b>Methods</b>            |         |                                                                                                                                                                                                   |         |
| Study design              | 4       | Present key elements of study design early in the paper                                                                                                                                           | 5       |
| Setting                   | 5       | Describe the setting, locations, and relevant dates, including periods of recruitment, exposure, follow-up, and data collection                                                                   | 5       |
| Participants              | 6       | (a) Give the eligibility criteria, and the sources and methods of selection of participants                                                                                                       | 5-6     |
| Variables                 | 7       | Clearly define all outcomes, exposures, predictors, potential confounders, and effect modifiers. Give diagnostic criteria, if applicable                                                          | 6       |
| Data sources/measurement  | 8*      | For each variable of interest, give sources of data and details of methods of assessment (measurement). Describe comparability of assessment methods if there is more than one group              | 7       |
| Bias                      | 9       | Describe any efforts to address potential sources of bias                                                                                                                                         | 7       |
| Study size                | 10      | Explain how the study size was arrived at                                                                                                                                                         | 5       |
| Quantitative variables    | 11      | Explain how quantitative variables were handled in the analyses. If applicable, describe which groupings were chosen and why                                                                      | 6-7     |
| Statistical methods       | 12      | (a) Describe all statistical methods, including those used to control for confounding                                                                                                             | 7       |
|                           |         | (b) Describe any methods used to examine subgroups and interactions                                                                                                                               | 7       |
|                           |         | (c) Explain how missing data were addressed                                                                                                                                                       | 7       |
|                           |         | (d) If applicable, describe analytical methods taking account of sampling strategy                                                                                                                | 7       |
|                           |         | (e) Describe any sensitivity analyses                                                                                                                                                             | 7       |
| <b>Results</b>            |         |                                                                                                                                                                                                   |         |
| Participants              | 13*     | (a) Report numbers of individuals at each stage of study—eg numbers potentially eligible, examined for eligibility, confirmed eligible, included in the study, completing follow-up, and analysed | 8       |
|                           |         | (b) Give reasons for non-participation at each stage                                                                                                                                              | 8       |
|                           |         | (c) Consider use of a flow diagram                                                                                                                                                                | -       |
| Descriptive data          | 14*     | (a) Give characteristics of study participants (eg demographic, clinical, social) and information on exposures and potential confounders                                                          | 8-10    |
|                           |         | (b) Indicate number of participants with missing data for each variable of interest                                                                                                               | 8       |
| Outcome data              | 15*     | Report numbers of outcome events or summary measures                                                                                                                                              | 8-9     |

## Seroprevalence of anti-SARS-CoV-2 antibodies in women attending antenatal care in eastern Ethiopia

|                          |    |                                                                                                                                                                                                              |       |
|--------------------------|----|--------------------------------------------------------------------------------------------------------------------------------------------------------------------------------------------------------------|-------|
| Main results             | 16 | (a) Give unadjusted estimates and, if applicable, confounder-adjusted estimates and their precision (eg, 95% confidence interval). Make clear which confounders were adjusted for and why they were included | 8-9   |
|                          |    | (b) Report category boundaries when continuous variables were categorized                                                                                                                                    | 9     |
|                          |    | (c) If relevant, consider translating estimates of relative risk into absolute risk for a meaningful time period                                                                                             | -     |
| Other analyses           | 17 | Report other analyses done—eg analyses of subgroups and interactions, and sensitivity analyses                                                                                                               | 9     |
| <b>Discussion</b>        |    |                                                                                                                                                                                                              |       |
| Key results              | 18 | Summarise key results with reference to study objectives                                                                                                                                                     | 9-10  |
| Limitations              | 19 | Discuss limitations of the study, taking into account sources of potential bias or imprecision. Discuss both direction and magnitude of any potential bias                                                   | 10    |
| Interpretation           | 20 | Give a cautious overall interpretation of results considering objectives, limitations, multiplicity of analyses, results from similar studies, and other relevant evidence                                   | 10-12 |
| Generalisability         | 21 | Discuss the generalisability (external validity) of the study results                                                                                                                                        | 11-12 |
| <b>Other information</b> |    |                                                                                                                                                                                                              |       |
| Funding                  | 22 | Give the source of funding and the role of the funders for the present study and, if applicable, for the original study on which the present article is based                                                | 16    |

\*Give information separately for exposed and unexposed groups.

**Note:** An Explanation and Elaboration article discusses each checklist item and gives methodological background and published examples of transparent reporting. The STROBE checklist is best used in conjunction with this article (freely available on the Web sites of PLoS Medicine at <http://www.plosmedicine.org/>, Annals of Internal Medicine at <http://www.annals.org/>, and Epidemiology at <http://www.epidem.com/>). Information on the STROBE Initiative is available at [www.strobe-statement.org](http://www.strobe-statement.org).
