# Supplementary material for: Seroprevalence of anti-SARS-CoV-2 antibodies in women attending antenatal care in eastern Ethiopia: a facility-based surveillance
Source: PubMed Central journal article supplement (PMC8613670; doi:10.1136/bmjopen-2021-055834), 2021-11-24
Supplement: bmjopen-2021-055834supp001.pdf [file bmjopen-2021-055834supp001.pdf]

**Supplementary table 1: Characteristics of women who were in the surveillance in the two study areas between April 2020 and March 2021 and sampled at random for the study.**

| Characteristics    | Tested |       | Not tested |      | Total |
|--------------------|--------|-------|------------|------|-------|
|                    | n      | %     | n          | %    | N     |
| All                | 1,447  | 43.7  | 1,865      | 56.3 | 3,312 |
| Age in years       |        |       |            |      |       |
| 14-19              | 192    | 44.3  | 241        | 55.7 | 433   |
| 20-24              | 588    | 42.5  | 797        | 57.6 | 1385  |
| 25-29              | 400    | 41.8  | 556        | 58.2 | 956   |
| 30-34              | 210    | 49.0  | 219        | 51.1 | 529   |
| >=35               | 56     | 51.9  | 52         | 48.2 | 108   |
| Residence          |        |       |            |      |       |
| Urban              | 984    | 43.5  | 1,277      | 56.5 | 2,261 |
| Rural              | 461    | 44.2  | 582        | 55.8 | 1,043 |
| Number of children |        |       |            |      |       |
| None               | 552    | 43.6  | 713        | 56.4 | 1,265 |
| 1-5                | 823    | 43.4  | 1,073      | 56.6 | 1,896 |
| 6-10               | 61     | 46.2  | 71         | 53.8 | 132   |
| Trimester of visit |        |       |            |      |       |
| First              | 366    | 39.6  | 558        | 60.4 | 924   |
| Second             | 658    | 45.0  | 805        | 55.0 | 1,463 |
| Third              | 423    | 45.7  | 502        | 54.3 | 925   |
| Comorbidities      |        |       |            |      |       |
| None               | 1,439  | 43.7  | 1,857      | 56.3 | 3,296 |
| At least one*      | 8      | 50.0  | 8          | 50.0 | 16    |
| COVID symptoms†    |        |       |            |      |       |
| No                 | 1,389  | 43.7  | 1,791      | 56.3 | 3,180 |
| Yes                | 51     | 42.9  | 68         | 57.1 | 119   |
| Month of sampling  |        |       |            |      |       |
| April 2020         | 144    | 38.0  | 235        | 62.0 | 379   |
| May 2020           | 144    | 32.4  | 301        | 67.6 | 445   |
| June 2020          | 143    | 37.9  | 234        | 62.1 | 377   |
| July 2020          | 80     | 69.0  | 36         | 31.0 | 116   |
| August 2020        | 80     | 37.4  | 134        | 62.6 | 214   |
| September 2020     | 80     | 41.7  | 112        | 58.3 | 192   |
| October 2020       | 72     | 100.0 | 0          | 0.0  | 72    |
| November 2020      | 80     | 44.7  | 99         | 55.3 | 179   |
| December 2020      | 160    | 53.9  | 137        | 46.1 | 297   |
| January 2021       | 160    | 55.9  | 126        | 44.1 | 286   |
| February 2021      | 160    | 55.0  | 131        | 45.0 | 291   |
| March 2021         | 144    | 31.0  | 320        | 69.0 | 464   |

\* chronic liver, renal, cardiovascular or 'other' disease

† at least one of cough, fever, headache or difficulty breathing
